# Supplementary material for: Graham Roberts Study protocol: first ‘trials within cohort study’ for bladder cancer
Source: PubMed Central journal article supplement — BMJ Open. 2019 Sep 26;9(9):e029468. doi: 10.1136/bmjopen-2019-029468 (PMC6773355; doi:10.1136/bmjopen-2019-029468), 2019-09-26
Supplement: bmjopen-2019-029468.draft_revisions.pdf [file bmjopen-2019-029468.draft_revisions.pdf]

# BMJ Open

BMJ Open is committed to open peer review. As part of this commitment we make the peer review history of every article we publish publicly available.

When an article is published we post the peer reviewers' comments and the authors' responses online. We also post the versions of the paper that were used during peer review. These are the versions that the peer review comments apply to.

The versions of the paper that follow are the versions that were submitted during the peer review process. They are not the versions of record or the final published versions. They should not be cited or distributed as the published version of this manuscript.

BMJ Open is an open access journal and the full, final, typeset and author-corrected version of record of the manuscript is available on our site with no access controls, subscription charges or pay-per-view fees (<http://bmjopen.bmj.com>).

If you have any questions on BMJ Open's open peer review process please email [info.bmjopen@bmj.com](mailto:info.bmjopen@bmj.com)

# BMJ Open

## The Graham Roberts Study: a first "Trials within Cohort study" for bladder cancer

|                               |                                                                                                                                                                                                                                                                                                                                                                                                                                                                                                                                                                                                                                                                                                                                                                                                                                                                                                                                                                                                                                                                                                                                                                                                                                                                                                                                                                                                                                                                                                                                                                                                                                                                                                                                                                                                     |
|-------------------------------|-----------------------------------------------------------------------------------------------------------------------------------------------------------------------------------------------------------------------------------------------------------------------------------------------------------------------------------------------------------------------------------------------------------------------------------------------------------------------------------------------------------------------------------------------------------------------------------------------------------------------------------------------------------------------------------------------------------------------------------------------------------------------------------------------------------------------------------------------------------------------------------------------------------------------------------------------------------------------------------------------------------------------------------------------------------------------------------------------------------------------------------------------------------------------------------------------------------------------------------------------------------------------------------------------------------------------------------------------------------------------------------------------------------------------------------------------------------------------------------------------------------------------------------------------------------------------------------------------------------------------------------------------------------------------------------------------------------------------------------------------------------------------------------------------------|
| Journal:                      | <i>BMJ Open</i>                                                                                                                                                                                                                                                                                                                                                                                                                                                                                                                                                                                                                                                                                                                                                                                                                                                                                                                                                                                                                                                                                                                                                                                                                                                                                                                                                                                                                                                                                                                                                                                                                                                                                                                                                                                     |
| Manuscript ID                 | bmjopen-2019-029468                                                                                                                                                                                                                                                                                                                                                                                                                                                                                                                                                                                                                                                                                                                                                                                                                                                                                                                                                                                                                                                                                                                                                                                                                                                                                                                                                                                                                                                                                                                                                                                                                                                                                                                                                                                 |
| Article Type:                 | Protocol                                                                                                                                                                                                                                                                                                                                                                                                                                                                                                                                                                                                                                                                                                                                                                                                                                                                                                                                                                                                                                                                                                                                                                                                                                                                                                                                                                                                                                                                                                                                                                                                                                                                                                                                                                                            |
| Date Submitted by the Author: | 18-Feb-2019                                                                                                                                                                                                                                                                                                                                                                                                                                                                                                                                                                                                                                                                                                                                                                                                                                                                                                                                                                                                                                                                                                                                                                                                                                                                                                                                                                                                                                                                                                                                                                                                                                                                                                                                                                                         |
| Complete List of Authors:     | <p>Wylie, Harriet; King's College London, Translational Oncology and Urology Research<br/> Cahill, Fidelma; King's College London, Translational Oncology and Urology Research<br/> Santaolalla, Aida ; King's College London, Translational Oncology and Urology Research<br/> Moss, Charlotte; King's College London, Translational Oncology and Urology Research<br/> Enting, Deborah; King's College London, Translational Oncology and Urology Research; Guy's and Saint Thomas' NHS Foundation Trust, Department of Medical Oncology<br/> Amery , Suzanne; Guy's and Saint Thomas' NHS Foundation Trust, Urology Centre<br/> Chatterton, Kathryn; Guy's and Saint Thomas' NHS Foundation Trust, Urology Centre<br/> Khan, Muhammad; Guy's &amp; St Thomas' Hospital, Urology<br/> Bryan, Richard; University of Birmingham<br/> Gillett, Cheryl; King's College London, King's Health Partners Cancer Biobank<br/> Josephs, Debra; King's College London, Translational Oncology and Urology Research; Guy's and Saint Thomas' NHS Foundation Trust, Department of Medical Oncology<br/> Chowdhury, Simon; King's College London, Translational Oncology and Urology Research; Guy's and Saint Thomas' NHS Foundation Trust, Department of Medical Oncology<br/> Rudman, Sarah; King's College London, Translational Oncology and Urology Research; Guy's and Saint Thomas' NHS Foundation Trust, Department of Medical Oncology<br/> Hughes, Simon; King's College London, Translational Oncology and Urology Research; Guy's and Saint Thomas' NHS Foundation Trust, Department of Medical Oncology<br/> Relton, Clare; University of Sheffield, SchARR; Queen Mary University of London<br/> Van Hemelrijck, Mieke; King's College London, Translational Oncology and Urology Research</p> |
| Keywords:                     | trials within cohorts, bladder cancer, randomised control trial, prospective cohort study                                                                                                                                                                                                                                                                                                                                                                                                                                                                                                                                                                                                                                                                                                                                                                                                                                                                                                                                                                                                                                                                                                                                                                                                                                                                                                                                                                                                                                                                                                                                                                                                                                                                                                           |
|                               |                                                                                                                                                                                                                                                                                                                                                                                                                                                                                                                                                                                                                                                                                                                                                                                                                                                                                                                                                                                                                                                                                                                                                                                                                                                                                                                                                                                                                                                                                                                                                                                                                                                                                                                                                                                                     |

1  
2  
3  
4  
5  
6  
7  
8  
9  
10  
11  
12  
13  
14  
15  
16  
17  
18  
19  
20  
21  
22  
23  
24  
25  
26  
27  
28  
29  
30  
31  
32  
33  
34  
35  
36  
37  
38  
39  
40  
41  
42  
43  
44  
45  
46  
47  
48  
49  
50  
51  
52  
53  
54  
55  
56  
57  
58  
59  
60

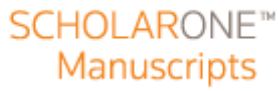

## The Graham Roberts Study: a first “Trials within Cohort study” for bladder cancer

Wylie H<sup>1</sup>, Cahill F<sup>1</sup>, Santaolalla A<sup>1</sup>, \*Moss CL<sup>1</sup>, Enting D<sup>1,2</sup>, Amery S<sup>3</sup>, Chatterton K<sup>3</sup>, Khan SM<sup>3</sup>, Bryan RT<sup>4</sup>, Gillett C<sup>5</sup>, Josephs D<sup>1,2</sup>, Chowdhury S<sup>1,2</sup>, Rudman S<sup>1,2</sup>, Hughes S,<sup>1,2</sup> Relton C<sup>6,7</sup>, Van Hemelrijck M<sup>1</sup>.

### Affiliations:

1. King’s College London, School of Cancer and Pharmaceutical Sciences, Translational Oncology & Urology Research (TOUR), London, UK
2. Guy’s and St Thomas’ NHS Foundation Trust, Department of Medical Oncology, London, UK
3. Guy’s and St Thomas’ NHS Foundation Trust, Urology Centre, London, UK
4. University of Birmingham, Institute of Cancer & Genomic Sciences, Birmingham, UK
5. King’s College London, King’s Health Partners Cancer Biobank, London, UK
6. University of Sheffield, ScHARR, Sheffield, UK
7. Queen Mary University, London, UK

### \*Corresponding author:

Miss Charlotte Moss  
Translational Oncology & Urology Research (TOUR)  
Guy’s Hospital, 3<sup>rd</sup> Floor Bermondsey Wing, London SE1 9RT, UK  
[charlotte.moss@kcl.ac.uk](mailto:charlotte.moss@kcl.ac.uk)  
020 718 52985

**Email addresses:** [harriet.wylie@kcl.ac.uk](mailto:harriet.wylie@kcl.ac.uk); [fidelma.cahill@kcl.ac.uk](mailto:fidelma.cahill@kcl.ac.uk); [aida.santaolalla@kcl.ac.uk](mailto:aida.santaolalla@kcl.ac.uk); [charlotte.moss@kcl.ac.uk](mailto:charlotte.moss@kcl.ac.uk); [Deborah.enting@kcl.ac.uk](mailto:Deborah.enting@kcl.ac.uk); [Suzanne.amery@gstt.nhs.uk](mailto:Suzanne.amery@gstt.nhs.uk); [Kathryn.chatterton@gstt.nhs.uk](mailto:Kathryn.chatterton@gstt.nhs.uk); [shamim.khan@gstt.nhs.uk](mailto:shamim.khan@gstt.nhs.uk); [R.T.Bryan@bham.ac.uk](mailto:R.T.Bryan@bham.ac.uk); [Cheryl.gillett@kcl.ac.uk](mailto:Cheryl.gillett@kcl.ac.uk); [debra.josephs@kcl.ac.uk](mailto:debra.josephs@kcl.ac.uk); [simon.chowdhury@gstt.nhs.uk](mailto:simon.chowdhury@gstt.nhs.uk); [sarah.rudman@gstt.nhs.uk](mailto:sarah.rudman@gstt.nhs.uk); [simon.1.hughes@kcl.ac.uk](mailto:simon.1.hughes@kcl.ac.uk); [c.relton@sheffield.ac.uk](mailto:c.relton@sheffield.ac.uk); [mieke.vanhemelrijck@kcl.ac.uk](mailto:mieke.vanhemelrijck@kcl.ac.uk)

1  
2  
3 **32 Abstract**  
4

5 **33 Background:** Given the need for more bladder cancer research and the recently observed  
6  
7 **34** advantages of introducing the trials within cohort (TwiCs) design, the set-up of the Graham Roberts  
8  
9 **35** Study (Roberts Study) will provide valuable infrastructure to answer a wide variety of research  
10  
11 **36** questions of a clinical, mechanistic, as well as supportive care nature in the area of bladder cancer.  
12  
13

14 **37 Methods:** Using the TwiCs design, we will recruit patients aged 18 or older who are willing and able  
15  
16 **38** to provide signed informed consent and have a diagnosis of an active new or recurrent bladder  
17  
18 **39** cancer into this prospective cohort study. All patients have to have a basic understanding of the  
19  
20 **40** English language. The following questionnaires will be collected baseline and every 12 months:  
21  
22 **41** Functional assessment of chronic illness therapy for bladder cancer (FACT-BI), the Functional  
23  
24 **42** assessment of chronic illness therapy-fatigue (FACIT-Fatigue), the Patient health questionnaire-9  
25  
26 **43** (PHQ-9), the Standardised instrument for a generic health status (EQ-5D-5L), a questionnaire to  
27  
28 **44** assess health enhancing physical activity (SQUASH), and the Hertfordshire short questionnaire to  
29  
30 **45** assess diet quality.  
31  
32

33  
34 **46 Discussion:** The main outcome of this work will thus be a well-annotated cohort of bladder cancer  
35  
36 **47** patients that provides the opportunity to address a wide variety of important research questions. It  
37  
38 **48** will also allow the efficient set-up of new randomised controlled trials (RCTs) for bladder cancer  
39  
40 **49** patients (e.g. a smoking cessation intervention), whilst making use of the linkage with our existing  
41  
42 **50** King's Health Partners' Bladder Cancer Biobank.  
43  
44  
45

46 **51**

47 **52**

48  
49 **53 Keywords:** trials within cohorts, bladder cancer, randomised controlled trial, prospective cohort

50  
51 **54** study  
52  
53  
54  
55  
56  
57  
58  
59 **57**  
60

## 58 **Strengths and Limitations**

- 59 1. First trials within cohort (TwICs) study design for bladder cancer.
- 60 2. TwICs design generates a of wide variety of research opportunities with limited risk to  
61 patients.
- 62 3. The non-interventional nature of this study means patient participation may not benefit  
63 patients' bladder cancer prognosis or quality of life.

## 66 **Background**

67 Bladder cancer is the 7<sup>th</sup> most common cancer in the UK, with c.10,400 patients diagnosed annually  
68 [1]; c. 50% of patients will survive their cancer for 10 years or more after diagnosis. For the majority  
69 of patients, the disease remains indolent following initial treatment, and invasive and burdensome  
70 surveillance is required to mitigate the high risk of recurrence [2]. However, there is proportionally  
71 less research into bladder cancer compared to breast, prostate or kidney cancer [3]. To provide the  
72 most efficient and high impact research strategy for bladder cancer patients in the UK, we have  
73 established a prospective cohort study of newly diagnosed bladder cancer patients to allow research  
74 that can efficiently address clinical, mechanistic, as well as supportive care related questions. The  
75 main outcome of this work will thus be a well-annotated cohort of bladder cancer patients that  
76 provides the opportunity to address a wide variety of important research questions. It will also allow  
77 the efficient set-up of new randomised controlled trials (RCTs) for bladder cancer patients (e.g. a  
78 smoking cessation intervention), whilst making use of the linkage with our existing King's Health  
79 Partners' Bladder Cancer Biobank.

80  
81 The design of this bladder cancer cohort study is similar to the Utrecht cohort for Multiple BREast  
82 cancer intervention studies and Long-term evaLuAtion (UMBRELLA) [4], which is based on the TwICs

1  
2  
3 83 design introduced by Relton et al. at the University of Sheffield in 2010 [5]. It is the first TwiCs design  
4  
5 84 study in the area of bladder cancer. More information about the TwiCs design can be found below.  
6  
7  
8 85

9  
10 86 The use of TwiCs has grown substantially in the last few years, with several new initiatives in the UK.  
11  
12 87 A 2015 systematic review identified 16 studies implementing the TwiCs design, with a total of 18  
13  
14 88 ongoing or completed trials embedded within these cohorts [6]. Some cohorts focused on a single  
15  
16 89 disease or injury (e.g. hip fracture, breast cancer, colorectal cancer), whilst others had a wider focus  
17  
18 90 (e.g. risk of mental health conditions, risk of falls). Some studies built a cohort around a trial, and  
19  
20 91 then obtained further funds to exploit the cohort for further trials within that cohort. At least six  
21  
22 92 TwiCs studies are ongoing in the UK [7], of which one is the Yorkshire Health Study [8]. The latter is  
23  
24 93 a longitudinal observational regional health study collecting health information on the residents of  
25  
26 94 the Yorkshire and Humberside region in England [8]. The study principally aims to inform National  
27  
28 95 Health Service (NHS) and local authority health-related decision making in Yorkshire, but with  
29  
30 96 additional wider implications from the findings as well.  
31  
32  
33  
34  
35  
36  
37  
38

39 97  
36 98 The main objectives of the Graham Roberts study (Roberts Study) are:

- 39 99 • To create a prospective cohort study of well-characterised bladder cancer patients, which  
40  
41 100 provides the opportunity to conduct a variety of observational studies.
- 43 101 • To create the infrastructure for future RCTs that will allow more efficient recruitment using  
44  
45 102 patient-centred informed consent  
46  
47  
48  
49

## 50 104 **Methods/Design**

### 51 52 105 *TwiCs design*

53  
54 106 TwiCs, originally introduced as cohort multiple randomised controlled trial design, was introduced to  
55  
56 107 address the problems associated with existing approaches for trials informing routine clinical  
57  
58 108 practice [5]. The design can be described as follows: Firstly, a large observational cohort of patients  
59  
60

1  
2  
3 109 with the condition of interest is recruited and their outcomes regularly measured. Then for each  
4  
5 110 randomised controlled trial (RCT), information from the cohort is used to identify all eligible  
6  
7 111 patients. Some eligible patients are randomly selected and offered the trial intervention. The  
8  
9 112 outcomes of these randomly selected patients are then compared with the outcomes of eligible  
10  
11 113 patients not randomly selected, that is, those receiving usual care. This process can be repeated for  
12  
13 114 further randomised controlled trials [5].  
14  
15  
16  
17 115

18  
19 116 The recruitment and regular follow-up of a large cohort of patients are characteristics of longitudinal  
20  
21 117 observational studies. In the TwiCs design, however, all patients in the cohort consent at the outset  
22  
23 118 to provide data to be used to look at the benefits of treatments for the condition of interest. The  
24  
25 119 capacity for multiple RCTs over time using patients from the same cohort is unique to the TwiCs  
26  
27 120 design. Random selection of some eligible cohort patients, the comparison of their outcomes with  
28  
29 121 the outcomes in eligible patients not randomly selected and the similarity of the patient-centred  
30  
31 122 informed consent approach to real life situations offer solutions to the ethical criticisms of  
32  
33 123 randomised consent designs [5].  
34  
35  
36  
37 124

### 38 39 125 *The Graham Roberts Study*

40  
41 126 Patients will be recruited at Guy's and St Thomas' (GSTT) NHS Foundation Trust, London, UK. All  
42  
43 127 patients following their first visit for their active new or recurrent bladder cancer will be eligible.  
44  
45 128 Patients with limited understanding of the English language and patients under the age of 18 years  
46  
47 129 are ineligible. Since Guy's Hospital is a referral centre the Roberts Study will include patients from  
48  
49 130 secondary and tertiary hospitals. Each year, approximately 100 eligible patients visit GSTT for  
50  
51 131 bladder cancer management.  
52  
53  
54 132  
55  
56 133 All eligible patients who have already been informed about a (highly likely) bladder cancer at the  
57  
58 134 time of visiting the Urology Centre, will receive detailed written information about the Roberts Study  
59  
60



1  
2  
3 135 whilst waiting for their appointment. They will then be scheduled to see a member of the direct  
4  
5 136 clinical care team and a research nurse/assistant 30 minutes prior to their first appointment with the  
6  
7 137 Consultant (urology or oncology). During this research consultation, the research nurse/assistant will  
8  
9 138 explain the study in detail and written informed consent will be obtained from those who agree to  
10  
11 139 participate. At this time, the patients will also be asked to fill out the baseline questionnaire.  
12  
13

14 140

15  
16 141 For those eligible patients who have not yet been informed about their bladder cancer at the time of  
17  
18 142 visiting the Urology Centre, detailed written information about the Roberts Study will be provided by  
19  
20 143 a research nurse/assistant after they have met with the consultant. If the patients are not ready to  
21  
22 144 discuss this study in further detail, a follow-up call will be made one week later to obtain their  
23  
24 145 consent, if they have agreed to participate.  
25  
26 146

27 146

28  
29 147 The Roberts Study will serve as a facility for multiple trials and follows the TwiCs design. In this  
30  
31 148 context, informed consent will be obtained through a staged procedure [9]. Before entering the  
32  
33 149 cohort, all patients give written informed consent for collection and use of their clinical data.  
34  
35

36 150 Patient-reported outcomes (PROMs) and other relevant questionnaires are collected at baseline and  
37  
38 151 at fixed intervals during follow-up. At this stage, the patients will also be invited to consent for the  
39  
40 152 King's Health Partner's Cancer Biobank – allowing for a link between the Roberts Study and their  
41  
42 153 biospecimen collection. However, consent to the Biobank is not a requirement for participating in  
43  
44 154 the Roberts Study.  
45  
46 155

47 155

48  
49 156 In addition, patients may give consent to be randomly allocated to experimental intervention  
50  
51 157 relating to bladder cancer in the (near) future. Only those patients randomly allocated to the  
52  
53 158 intervention arm will be offered the experimental intervention (which they can accept or decline). If  
54  
55 159 they accept, additional written informed consent to undergo the experimental intervention will be  
56  
57 160 obtained. Patients who decline intervention will receive standard of care, which will be unaffected  
58  
59  
60

1  
2  
3 161 by the fact they have declined to participate in the randomised element of this study. Patients who  
4  
5 162 are randomly allocated to the control arm will also receive standard of care, and are not informed  
6  
7 163 about their participation in the control arm. This additional consent will be obtained at the time of  
8  
9 164 consent for the cohort study.  
10  
11

12 165  
13  
14 166 Data from all patients may be used for observational studies in the Roberts Study, but only those  
15  
16 167 who provide consent for randomisation are eligible for participation in the RCTs within the Roberts  
17  
18 168 Study. After completion of an RCT within the Roberts Study, all patients – irrespective of  
19  
20 169 participation in the specific study – will receive aggregated results via a newsletter that they can  
21  
22 170 subscribe to at time of initial consent.  
23  
24  
25

26 171  
27  
28 172 Thus, the TwiCs design is based on an “asymmetric informed consent”. After recruitment into the  
29  
30 173 Roberts cohort, randomisation of eligible subjects, can be followed by an asymmetric treatment of  
31  
32 174 the two arms. Those selected for the experimental arm provide informed consent for the  
33  
34 175 intervention trial, while the data from the control arm are used based on prior broad permission.  
35  
36 176 Hence, the cohort participants are informed about future research within the cohort.  
37  
38

39 177

#### 40 41 178 *Patient and Public Engagement*

42  
43 179 The development of the Graham Roberts Study was informed in collaboration with patient  
44  
45 180 representatives diagnosed and treated at Guy’s and St Thomas’ NHS Foundation Trust. Prior to  
46  
47 181 development of the study protocol, a focus group was held to discuss the acceptability of the TwiCs  
48  
49 182 study design and the content of the self-administered questionnaire. Patients of similar bladder  
50  
51 183 cancer diagnoses to those that will be consented onto the study were recruited into this focus  
52  
53 184 group. Based on the patient’s experiences and preferences, the Graham Roberts Study design was  
54  
55 185 agreed. Results of the study will be disseminated to the patients through annual newsletters and on  
56  
57 186 a study specific website for patients.  
58  
59  
60

1  
2  
3 187 *Selection and withdrawal of subjects*  
4

5 188 Patients eligible to participate in this study are those who meet all of the following inclusion criteria:  
6

7  
8 189 • Appointment for an active new or recurrent bladder cancer diagnosis at Guy's and St Thomas'  
9

10 190 NHS Foundation Trust  
11

12 191 • Minimum age of 18 years  
13

14 192 • Basic understanding of English  
15

16  
17 193 Patients must NOT meet any of the following exclusion criteria:  
18

19 194 • Younger than 18 years  
20

21 195 • Limited understanding of English  
22

23  
24 196

25  
26 197 Patients will be identified in multi-disciplinary team meetings or in out-patient clinics by the clinical  
27

28 198 team, in collaboration with the research nurse. Participants have the right to withdraw from the  
29

30 199 study at any time for any reason. Their routine medical and surgical care will not be affected.  
31

32  
33 200

34  
35 201 *Expected duration of the study*  
36

37 202 As this study is an observational prospective cohort study, it is difficult to estimate its duration. We  
38

39 203 aim to recruit a minimum of 400 patients over a period of 5 years, though there is no limit to the  
40

41 204 number of patients needed for a prospective cohort study. Moreover, over time new research  
42

43 205 opportunities will develop and potential funding may become available to continue recruitment into  
44

45 206 the Roberts Study. Patients will be followed up for life through data linkages with Hospital Episode  
46

47 207 Statistics (HES), the Office for National Statistics (ONS) and electronic patient records.  
48

49  
50 208  
51

52 209 *Study procedures by visit*  
53

54 210 All potentially eligible patients who already know they have bladder cancer will receive detailed  
55

56 211 written information about the Roberts Study whilst they are waiting for their appointment. They will  
57

58 212 be scheduled to see a member of the direct clinical care team and a research nurse/assistant 30  
59  
60

1  
2  
3 213 minutes prior to their appointment with the consultant (urology or oncology). During this research  
4  
5 214 consultation, the research nurse/assistant will explain the study in detail, and written informed  
6  
7 215 consent for entering the cohort and potential entry into an intervention arm will be obtained from  
8  
9 216 those who agree to participate. Patients who require more time to consider their consent, will be  
10  
11 217 given this time and will be approached at their next scheduled clinical visit. If at that time they do  
12  
13 218 not want to consent, patients will not be approached again.  
14  
15  
16  
17

18  
19 220 For those eligible patients who have not yet been informed about their bladder cancer at the time of  
20  
21 221 visiting the Urology Centre, detailed written information about the Roberts Study will be provided by  
22  
23 222 a research nurse/assistant after they have met with the consultant. If the patients are not ready to  
24  
25 223 discuss this study in further detail, they will be given more time to consider their consent and will be  
26  
27 224 approached again at their next scheduled clinical visit. If at that time they do not want to consent,  
28  
29 225 patients will not be approached again.  
30  
31  
32

33 226  
34 227 Following this consent (baseline), the patients will be given a variety of questionnaires either on  
35  
36 228 paper or digital (tablet). It will take about 30 minutes to fill out the set of questionnaires at the  
37  
38 229 respective time point. Every 12 months thereafter, with a total follow-up of at least 10 years,  
39  
40 230 patients will be asked to fill out the questionnaires again, which may be sent via post/email or can  
41  
42 231 be filled out in clinic during a regular follow-up visit.  
43  
44  
45

46 232  
47  
48 233 If patients agree to also consent for the King's Health Partners Cancer Biobank (which is not a  
49  
50 234 requirement for being in the Roberts Study) at the time of consenting to the Roberts study, they will  
51  
52 235 also agree to:

- 53  
54 236
- 55 • donate paraffin processed tumour samples for research objectives
  - 56
  - 57 237 • have paraffin embedded blocks archived for research objectives
  - 58

59 238  
60

239 In addition, they may agree to donate additional blood, urine and tissue samples for research. The  
 240 standard operating procedures and ethical considerations for this entire process can be found  
 241 elsewhere [10] (REC 12/EE/0493).

242

#### 243 *Data collection*

244 Within the Roberts Study, various clinical data will be prospectively collected including  
 245 demographics, tumour characteristics, treatment and imaging data. Clinical data will be captured  
 246 from electronic medical records, referral letters and annual reports for Public Health England.

247

248 Socio-demographic data will include sex, date of birth, age at diagnosis, highest level of education,  
 249 postal code (to estimate the deprivation index), body mass index (BMI) and WHO performance  
 250 status.

251

252 The following tumour characteristics will be collected: TNM stage, grade, tumour diameter, number  
 253 of tumours, histology and morphological codes and invasiveness.

254

255 Treatment characteristics comprise data on type and timing of treatment given (e.g. intravesical  
 256 instillations, systemic chemotherapy, radical cystectomy, radiotherapy or other treatments). Table 1  
 257 shows the pre-, peri- and postoperative data that will be collected for the radical cystectomy  
 258 patients.

259

|               |                                                                                                                                                   |
|---------------|---------------------------------------------------------------------------------------------------------------------------------------------------|
| Preoperative  | TNM stage, weight, height, BMI, American Society of Anesthesiologists (ASA) score, previous pelvic surgery, radiation or neoadjuvant chemotherapy |
| Perioperative | Type of surgery, type of lymphadenectomy, type of urinary diversion, blood loss, duration of surgery, accidental organ injury during surgery      |
| Postoperative | Complications (Clavien-Dindo), re-operations and re-admissions within 90 days, length of hospital stay, pT stage, number of                       |

|  |                                                                      |
|--|----------------------------------------------------------------------|
|  | excised lymph nodes and number of excised and metastatic lymph nodes |
|--|----------------------------------------------------------------------|

260 **Table 1:** Data collection for those participants of the Roberts Study undergoing radical cystectomy.

261

262 Information on recurrence and survival will be collected annually by means of the data linkages with  
 263 HES, ONS and electronic patient records. We will also collect patient-reported outcome measures  
 264 (PROMs) by means of validated questionnaires designed to quantify health-related Quality of Life  
 265 (QoL) from the patients' perspective. These questionnaires will be given (paper (post) or digital  
 266 (email or tablet in clinic)) to patients upon entry into the cohort (baseline) and every 12 months  
 267 thereafter with a total follow-up of at least 10 years. It will take about 30 minutes to fill out the set  
 268 of questionnaires at each time point.

269

270 PROMs will be collected on QoL, fatigue, anxiety and depression, physical activity, dietary habits as  
 271 well as risk behaviour in terms of known bladder cancer risk factors. Following an assessment of  
 272 smoking behaviour, alcohol consumption and occupational bladder cancer risk factors, the following  
 273 validated questionnaires will be used (see Additional File 1):

274

- 275 • **Quality of Life:** Functional assessment of chronic illness therapy for bladder cancer (FACT-BI  
 276 [11])
- 277 • **Fatigue:** Functional assessment of chronic illness therapy-fatigue (FACIT-Fatigue [12])
- 278 • **Depression:** Patient health questionnaire-9 (PHQ-9 [13])
- 279 • **Health :** Standardised instrument for use as a measure of health outcome (EQ-5D-5L[14])
- 280 • **Physical activity:** Questionnaire to assess health enhancing physical activity (SQUASH [15])
- 281 • **Assessment of dietary habits:** Short questionnaire to assess diet quality [16]

282

1  
2  
3 283 *Assessment of safety*  
4

5 284 As this is a prospective cohort study with no specific interventions, adverse events (AEs) are unlikely  
6  
7 285 to take place. Nevertheless, if filling out questionnaire data should ever result in an AE, it will be  
8  
9 286 graded according to the NCI Common Terminology Criteria for Adverse Events (CTCAE) Version 4.0  
10  
11 287 and coded. These will be reported to the Data Monitoring Committee.  
12  
13

14 288

15  
16 289 *Sample size*  
17

18  
19 290 As this is a prospective cohort study, with no specific primary research question, it is not possible to  
20  
21 291 perform sample size calculations. However, it is still important to consider recruitment rates and  
22  
23 292 response rates to the questionnaires. In the Dutch UMBRELLA study, 1,308 out of 1,485 (88%)  
24  
25 293 patients who were invited consented to cohort participation [4]. Of those, 1,138 (87%) gave consent  
26  
27 294 for randomisation to future interventions. Return rates for questionnaires at baseline were 80%, and  
28  
29 295 varied from 67 to 74% during follow-up. Sixty percent of patients chose to fill out the questionnaires  
30  
31 296 online, while 40% opted for paper questionnaires [4].  
32  
33

34 297

35  
36 298 Given that we see on average about 150 eligible patients per year, we expect to recruit at least 400  
37  
38 299 patients over a period of five years. However, as described above, if more research and/or funding  
39  
40 300 opportunities come up, we will continue recruitment into the Roberts study.  
41  
42

43 301 *Direct Access to Source Data and Documents*  
44

45 302 The Investigator will prepare and maintain adequate and accurate source documents designed to  
46  
47 303 record all observations and other pertinent data for each patient in the Roberts Study. Study  
48  
49 304 personnel will enter data from source documents corresponding to a patient's visit into the  
50  
51 305 protocol-specific electronic case report forms (CRFs) in a dedicated, secure data warehouse. Patients  
52  
53 306 will not be identified by name in the study database or on any study documents to be collected by  
54  
55 307 the Sponsor (or Designee), but will be identified by patient ID numbers.  
56  
57  
58

59 308  
60

1  
2  
3 309 The database will be safeguarded against unauthorised access with established security procedures;  
4  
5 310 nightly backup of the database and related software files will be maintained. It will be backed up by  
6  
7 311 the database administrator in conjunction with any updates or changes to the database. At pre-  
8  
9 312 specified junctures of the protocol (e.g., production of interim and final reports), data for analysis  
10  
11 313 will be locked and cleaned as per established procedures. The data warehouse will be stored on a  
12  
13 314 secured KCL server and will be managed by a dedicated data scientist for the bladder cancer  
14  
15 315 research team who has an honorary contract with GSTT.  
16  
17  
18

316

20  
21 317 If a correction is required to a CRF, the time and date stamps will track the person entering or  
22  
23 318 updating CRF data and create an electronic audit trail. The Chief Investigator is responsible for  
24  
25 319 reviewing all information collected on patients enrolled in this study for completeness and accuracy.  
26  
27

320

28  
29  
30 321 To enable evaluations and/or audits from regulatory authorities, the CI agrees to keep records,  
31  
32 322 including the identity of all participating subjects (sufficient information to link records, e.g. CRFs  
33  
34 323 and hospital records), all original signed informed consent forms, safety reporting forms, source  
35  
36 324 documents and detailed records of treatment disposition and adequate documentation of relevant  
37  
38 325 correspondence (e.g. letters, meeting minutes, telephone call reports). The records should be  
39  
40 326 retained by the CI according to the International Conference on Harmonisation (ICH) or local  
41  
42 327 regulations; all study documentation must be retained for 10 years after the study ends.  
43  
44

328

### 47 329 *Ethics and Regulatory Approvals*

48  
49  
50 330 The study will be conducted in compliance with the principles of the Declaration of Helsinki (1996),  
51  
52 331 the principles of GCP, and in accordance with all applicable regulatory requirements including but  
53  
54 332 not limited to the Research Governance Framework and the Medicines for Human Use (Clinical Trial)  
55  
56 333 Regulations 2004, as amended in 2006 and any subsequent amendments.  
57  
58

334



1  
2  
3 335 This protocol and related documents were approved by the London – Fulham Research Ethics  
4  
5 336 Committee (REC) as part of gaining Health Research Authority (HRA) approval (17/LO/1975).

6  
7  
8 337

9  
10 338 *Quality Assurance*

11  
12 339 Monitoring of this study will be to ensure compliance with Good Clinical Practice, and scientific  
13  
14 340 integrity will be managed and oversight retained by the Data Monitoring Committee (DMC) led by Prof  
15  
16 341 Dominique Michaud. The committee will receive notification every 6 months of the interim and total  
17  
18 342 accrual. At the discretion of the chair of the DMC, interim analyses may be scheduled as modifications  
19  
20 343 to the protocol. Additional meetings during the study period may occur at the discretion of the  
21  
22 344 Steering Committee.  
23  
24

25 345

26  
27 346 The study design, analysis and reporting will follow the recent recommendations for good practice in  
28  
29 347 clinical outcomes assessment by the International Society for Pharmacoeconomics and Outcomes  
30  
31 348 Research (ISPOR) [17].  
32  
33

34 349

35  
36 350 *Data handling*

37  
38  
39 351 The Chief Investigator and delegates are responsible for daily cohort management. Data quality will  
40  
41 352 be checked periodically. The following guidelines will be strictly adhered to:

- 42  
43 353
- 44 • Patient data will be anonymised.
  - 45 • All anonymised data will be stored on a password protected encrypted computer.
  - 46 • All study data will be stored in line with the Data Protection Act as defined in the King's Health  
47  
48 355 Partners' Clinical Trials Office Archiving SOP.  
49  
50 356

51  
52 357 The data will be stored as outlined in the data management plan.  
53  
54  
55  
56  
57  
58  
59  
60

1  
2  
3 3584  
5 359 *Insurance/Indemnity*6  
7 360 The co-sponsors King's College London and Guy's and St Thomas' NHS Foundation Trust will provide8  
9 361 insurance and indemnity.10  
11 36212  
13  
14 363 **Discussion**15  
16 364 The Graham Roberts study is the first of its kind and thus the first TwiCs study for bladder cancer. It17  
18 365 generates a wide variety of research opportunities with limited risk to patients. Participation in19  
20 366 research involves some loss of privacy. We will do our best to make sure that all personal21  
22 367 information gathered for this study is kept private. As this is a non-interventional prospective cohort23  
24 368 study, participation may not have a beneficial effect on patients' bladder cancer prognosis or25  
26 369 quality-of-life compared to usual care.27  
28  
29  
30 37031  
32 371 The questionnaires to be used are quite detailed and, for the most part, concerns day-to-day33  
34 372 activities such as quality and duration of sleep, diet and exercise. The questionnaire does pose some35  
36 373 more personal and intrusive questions however, including questions related to symptoms of37  
38 374 depression. These questions can be omitted if the participant does not feel comfortable answering39  
40 375 them. There is a risk that some participants may be upset by having these questions posed to them.41  
42 376 Some participants may prefer to complete the questionnaire themselves, whereas others may prefer43  
44 377 to do so with a research assistant. Participants will be fully informed about these potential harms45  
46 378 and enabled to make an informed decision regarding participation. We consider that the potential47  
48 379 minor harms are outweighed by the potential benefits of the research.49  
50  
51  
52 38053  
54 381 Future research using the data in this study could lead to medical and scientific products,55  
56 382 discoveries, as well as interventions that improve the prevention, diagnosis and treatment of57  
58  
59  
60

1  
2  
3 383 bladder cancer. A benefit for the patients is also the possibility to be part of future RCTs by providing  
4  
5 384 consent for being part of the intervention arm.  
6  
7  
8 385

9  
10 386 **Trial Status**

11  
12 387 Protocol Version and Number: Version 2, January 2018

13  
14 388 Date of commencement of recruitment: 22<sup>nd</sup> February 2018

15  
16 389 Projected date of recruitment completion: 28<sup>th</sup> October 2022  
17  
18  
19  
20  
21  
22  
23  
24  
25  
26  
27  
28  
29  
30  
31  
32  
33  
34  
35  
36  
37  
38  
39  
40  
41  
42  
43  
44  
45  
46  
47  
48  
49  
50  
51  
52  
53  
54  
55  
56  
57  
58  
59  
60

## References

1. Cancer Research UK. Bladder Cancer Facts 2017 [Available from: <http://www.cancerresearchuk.org/about-cancer/bladder-cancer/about>].
2. Crawley D, Rudman S. Epidemiology of Bladder Cancer. In: Loda M, Mucci L, Mittelstadt M, Van Hemelrijck M, Cotter M, editors. *Pathology and Epidemiology of Cancer*: Springer; 2016.
3. Boormans JL, Zwarthoff EC. Limited Funds for Bladder Cancer Research and What Can We Do About It. *Bladder Cancer*. 2016;2(1):49-51.
4. Young-Afat DA, van Gils CH, van den Bongard H, Verkooijen HM, Group US. The Utrecht cohort for Multiple BREast cancer intervention studies and Long-term evaLuAtion (UMBRELLA): objectives, design, and baseline results. *Breast Cancer Res Treat*. 2017.
5. Relton C, Torgerson D, O'Cathain A, Nicholl J. Rethinking pragmatic randomised controlled trials: introducing the "cohort multiple randomised controlled trial" design. *BMJ*. 2010;340:c1066.
6. Relton C, Thomas K, Nicholl J, Uher R. Review of an innovative approach to practical trials: the 'cohort multiple RCT' design. *Trials*. 2015;16(Suppl 2):P114-P.
7. Relton C. Trials within Cohorts 2017 [Available from: <https://www.twics.global/use-of-the-design>].
8. Green MA, Li J, Relton C, Strong M, Kearns B, Wu M, et al. Cohort Profile: The Yorkshire Health Study. *Int J Epidemiol*. 2016;45(3):707-12.
9. Young-Afat DA, Verkooijen HM, Van Gils CH, Van der Velden JM, Burbach J, Elias SG, et al. Staged-informed consent in the cohort multiple randomized controlled trial design. *Epidemiology*. 2016.
10. Saifuddin SR, Devlies W, Santaolalla A, Cahill F, George G, Enting D, et al. King's Health Partners' Prostate Cancer Biobank (KHP PCaBB). *BMC Cancer*. 2017;17(1):784.
11. Cella D. *Manual of the Functional Assessment of Chronic Illness Therapy (FACIT) Scales Version 4.0*. 1997.
12. Lai JS, Cella D, Chang CH, Bode RK, Heinemann AW. Item banking to improve, shorten and computerize self-reported fatigue: an illustration of steps to create a core item bank from the FACIT-Fatigue Scale. *Qual Life Res*. 2003;12(5):485-501.
13. Kroenke K, Spitzer RL, Williams JB. The PHQ-9: validity of a brief depression severity measure. *J Gen Intern Med*. 2001;16(9):606-13.
14. Herdman M, Gudex C, Lloyd A, Janssen M, Kind P, Parkin D, et al. Development and preliminary testing of the new five-level version of EQ-5D (EQ-5D-5L). *Qual Life Res*. 2011;20(10):1727-36.
15. Wendel-Vos GC, Schuit AJ, Saris WH, Kromhout D. Reproducibility and relative validity of the short questionnaire to assess health-enhancing physical activity. *J Clin Epidemiol*. 2003;56(12):1163-9.
16. Robinson SM, Jameson KA, Bloom I, Ntani G, Crozier SR, Syddall H, et al. Development of a Short Questionnaire to Assess Diet Quality among Older Community-Dwelling Adults. *J Nutr Health Aging*. 2017;21(3):247-53.
17. Walton MK, Powers JH, 3rd, Hobart J, Patrick D, Marquis P, Vamvakas S, et al. *Clinical Outcome Assessments: Conceptual Foundation-Report of the ISPOR Clinical Outcomes Assessment - Emerging Good Practices for Outcomes Research Task Force*. *Value Health*. 2015;18(6):741-52.

### Additional Files

Additional File 1 – Graham Roberts Study Questionnaire (doc).  
The questionnaire given to patients who have consented to the Graham Roberts Study.

### List of abbreviations

|          |                                                                     |
|----------|---------------------------------------------------------------------|
| AE       | Adverse events                                                      |
| ASA      | American Society of Anesthesiologists                               |
| BMI      | Body Mass Index                                                     |
| CI       | Chief Investigator                                                  |
| CRF      | Case Research Form                                                  |
| CTCAE    | Common Terminology Criteria for Adverse Events                      |
| DMC      | Data Monitoring Committee                                           |
| EQ-5D-5L | Standardised instrument for use as a measure of health outcome      |
| FACT-BI  | Functional assessment of chronic illness therapy for bladder cancer |
| FACIT    | Functional assessment of chronic illness therapy - fatigue          |
| GCP      | Good Clinical Practice                                              |
| GSTT     | Guy's and St Thomas'                                                |
| HES      | Hospital Episode Statistics                                         |
| HRA      | Health Research Authority                                           |
| ICH      | International Conference on Harmonisation                           |
| ISPOR    | International Society for Pharmacoeconomics and Outcomes Research   |
| KCL      | King's College London                                               |
| NHS      | National Health Services                                            |
| ONS      | Office National Statistics                                          |
| PHQ-9    | Patient health questionnaire-9                                      |
| PI       | Principle Investigator                                              |
| PROMS    | Patient-reported outcomes                                           |
| QoL      | Quality of Life                                                     |
| RCT      | Randomise Clinical Trial                                            |
| REC      | Research Ethics Committee                                           |
| SOP      | Standard Operating Procedures                                       |
| SQUASH   | Questionnaire to assess health enhancing physical activity          |
| TwICs    | Trials within Cohorts                                               |
| UK       | United Kingdom                                                      |
| WHO      | World Health Organisation                                           |

**Declarations***Ethics approval and consent to participate*

The Fulham Research Ethics Committee approved the Graham Roberts Study on 22/02/2018 (Reference number: 17/LO/1975).

*Consent for publication*

Not applicable.

*Availability of data and material*

Data sharing is not applicable to this article as no datasets were generated or analysed during the current study.

*Competing interests*

The authors declare that they have no competing interests.

*Funding*

Funding to conduct the study is kindly provided by the Graham and Dianne Roberts Charitable Settlement. The funders had no role in the design of the study and collection, analysis, and interpretation of data nor in writing of the manuscript.

*Authors' contributions*

MVH, FC, HW, CR, CM, and AS designed the study with input from their clinical colleagues (SC, SH, SR, DE, DJ, RB, SA, KC, SK) and the biobank coordinator (CG). All authors read and approved the final manuscript.

*Acknowledgements*

We would like to thank our funder as well as all the patients who will contribute to the Graham Roberts Study. We would also like to extend our thanks to the patients who took part in the focus groups and informed the development of the Graham Roberts Study.

# BMJ Open

## The Graham Roberts Study Protocol: a first "Trials within Cohort study" for bladder cancer

|                                 |                                                                                                                                                                                                                                                                                                                                                                                                                                                                                                                                                                                                                                                                                                                                                                                                                                                                                                                                                                                                                                                                                                                                                                                                                                                                                                                                                                                                                                                                                                                                                                                                                                                                                                                                                                                                     |
|---------------------------------|-----------------------------------------------------------------------------------------------------------------------------------------------------------------------------------------------------------------------------------------------------------------------------------------------------------------------------------------------------------------------------------------------------------------------------------------------------------------------------------------------------------------------------------------------------------------------------------------------------------------------------------------------------------------------------------------------------------------------------------------------------------------------------------------------------------------------------------------------------------------------------------------------------------------------------------------------------------------------------------------------------------------------------------------------------------------------------------------------------------------------------------------------------------------------------------------------------------------------------------------------------------------------------------------------------------------------------------------------------------------------------------------------------------------------------------------------------------------------------------------------------------------------------------------------------------------------------------------------------------------------------------------------------------------------------------------------------------------------------------------------------------------------------------------------------|
| Journal:                        | <i>BMJ Open</i>                                                                                                                                                                                                                                                                                                                                                                                                                                                                                                                                                                                                                                                                                                                                                                                                                                                                                                                                                                                                                                                                                                                                                                                                                                                                                                                                                                                                                                                                                                                                                                                                                                                                                                                                                                                     |
| Manuscript ID                   | bmjopen-2019-029468.R1                                                                                                                                                                                                                                                                                                                                                                                                                                                                                                                                                                                                                                                                                                                                                                                                                                                                                                                                                                                                                                                                                                                                                                                                                                                                                                                                                                                                                                                                                                                                                                                                                                                                                                                                                                              |
| Article Type:                   | Protocol                                                                                                                                                                                                                                                                                                                                                                                                                                                                                                                                                                                                                                                                                                                                                                                                                                                                                                                                                                                                                                                                                                                                                                                                                                                                                                                                                                                                                                                                                                                                                                                                                                                                                                                                                                                            |
| Date Submitted by the Author:   | 30-Apr-2019                                                                                                                                                                                                                                                                                                                                                                                                                                                                                                                                                                                                                                                                                                                                                                                                                                                                                                                                                                                                                                                                                                                                                                                                                                                                                                                                                                                                                                                                                                                                                                                                                                                                                                                                                                                         |
| Complete List of Authors:       | <p>Wylie, Harriet; King's College London, Translational Oncology and Urology Research<br/> Cahill, Fidelma; King's College London, Translational Oncology and Urology Research<br/> Santaolalla, Aida ; King's College London, Translational Oncology and Urology Research<br/> Moss, Charlotte; King's College London, Translational Oncology and Urology Research<br/> Enting, Deborah; King's College London, Translational Oncology and Urology Research; Guy's and Saint Thomas' NHS Foundation Trust, Department of Medical Oncology<br/> Amery , Suzanne; Guy's and Saint Thomas' NHS Foundation Trust, Urology Centre<br/> Chatterton, Kathryn; Guy's and Saint Thomas' NHS Foundation Trust, Urology Centre<br/> Khan, Muhammad; Guy's &amp; St Thomas' Hospital, Urology<br/> Bryan, Richard; University of Birmingham<br/> Gillett, Cheryl; King's College London, King's Health Partners Cancer Biobank<br/> Josephs, Debra; King's College London, Translational Oncology and Urology Research; Guy's and Saint Thomas' NHS Foundation Trust, Department of Medical Oncology<br/> Chowdhury, Simon; King's College London, Translational Oncology and Urology Research; Guy's and Saint Thomas' NHS Foundation Trust, Department of Medical Oncology<br/> Rudman, Sarah; King's College London, Translational Oncology and Urology Research; Guy's and Saint Thomas' NHS Foundation Trust, Department of Medical Oncology<br/> Hughes, Simon; King's College London, Translational Oncology and Urology Research; Guy's and Saint Thomas' NHS Foundation Trust, Department of Medical Oncology<br/> Relton, Clare; University of Sheffield, SchARR; Queen Mary University of London<br/> Van Hemelrijck, Mieke; King's College London, Translational Oncology and Urology Research</p> |
| <b>Primary Subject Heading</b>: | Oncology                                                                                                                                                                                                                                                                                                                                                                                                                                                                                                                                                                                                                                                                                                                                                                                                                                                                                                                                                                                                                                                                                                                                                                                                                                                                                                                                                                                                                                                                                                                                                                                                                                                                                                                                                                                            |
| Secondary Subject Heading:      | Epidemiology, Oncology, Urology                                                                                                                                                                                                                                                                                                                                                                                                                                                                                                                                                                                                                                                                                                                                                                                                                                                                                                                                                                                                                                                                                                                                                                                                                                                                                                                                                                                                                                                                                                                                                                                                                                                                                                                                                                     |

1  
2  
3  
4  
5  
6  
7  
8  
9  
10  
11  
12  
13  
14  
15  
16  
17  
18  
19  
20  
21  
22  
23  
24  
25  
26  
27  
28  
29  
30  
31  
32  
33  
34  
35  
36  
37  
38  
39  
40  
41  
42  
43  
44  
45  
46  
47  
48  
49  
50  
51  
52  
53  
54  
55  
56  
57  
58  
59  
60

|           |                                                                                           |
|-----------|-------------------------------------------------------------------------------------------|
| Keywords: | trials within cohorts, bladder cancer, randomised control trial, prospective cohort study |
|           |                                                                                           |

SCHOLARONE™  
Manuscripts



## The Graham Roberts Study Protocol: a first “Trials within Cohort study” for bladder cancer

Wylie H<sup>1</sup>, Cahill F<sup>1</sup>, Santaolalla A<sup>1</sup>, \*Moss CL<sup>1</sup>, Enting D<sup>1,2</sup>, Amery S<sup>3</sup>, Chatterton K<sup>3</sup>, Khan SM<sup>3</sup>, Bryan RT<sup>4</sup>, Gillett C<sup>5</sup>, Josephs D<sup>1,2</sup>, Chowdhury S<sup>1,2</sup>, Rudman S<sup>1,2</sup>, Hughes S,<sup>1,2</sup> Relton C<sup>6,7</sup>, Van Hemelrijck M<sup>1</sup>.

### Affiliations:

1. King’s College London, School of Cancer and Pharmaceutical Sciences, Translational Oncology & Urology Research (TOUR), London, UK
2. Guy’s and St Thomas’ NHS Foundation Trust, Department of Medical Oncology, London, UK
3. Guy’s and St Thomas’ NHS Foundation Trust, Urology Centre, London, UK
4. University of Birmingham, Institute of Cancer & Genomic Sciences, Birmingham, UK
5. King’s College London, King’s Health Partners Cancer Biobank, London, UK
6. University of Sheffield, ScHARR, Sheffield, UK
7. Queen Mary University, London, UK

### \*Corresponding author:

Miss Charlotte Moss  
Translational Oncology & Urology Research (TOUR)  
Guy’s Hospital, 3<sup>rd</sup> Floor Bermondsey Wing, London SE1 9RT, UK  
[charlotte.moss@kcl.ac.uk](mailto:charlotte.moss@kcl.ac.uk)  
020 718 52985

**Email addresses:** [harriet.wylie@kcl.ac.uk](mailto:harriet.wylie@kcl.ac.uk); [fidelma.cahill@kcl.ac.uk](mailto:fidelma.cahill@kcl.ac.uk); [aida.santaolalla@kcl.ac.uk](mailto:aida.santaolalla@kcl.ac.uk); [charlotte.moss@kcl.ac.uk](mailto:charlotte.moss@kcl.ac.uk); [Deborah.enting@kcl.ac.uk](mailto:Deborah.enting@kcl.ac.uk); [Suzanne.amery@gstt.nhs.uk](mailto:Suzanne.amery@gstt.nhs.uk); [Kathryn.chatterton@gstt.nhs.uk](mailto:Kathryn.chatterton@gstt.nhs.uk); [shamim.khan@gstt.nhs.uk](mailto:shamim.khan@gstt.nhs.uk); [R.T.Bryan@bham.ac.uk](mailto:R.T.Bryan@bham.ac.uk); [Cheryl.gillett@kcl.ac.uk](mailto:Cheryl.gillett@kcl.ac.uk); [debra.josephs@kcl.ac.uk](mailto:debra.josephs@kcl.ac.uk); [simon.chowdhury@gstt.nhs.uk](mailto:simon.chowdhury@gstt.nhs.uk); [sarah.rudman@gstt.nhs.uk](mailto:sarah.rudman@gstt.nhs.uk); [simon.1.hughes@kcl.ac.uk](mailto:simon.1.hughes@kcl.ac.uk); [c.relton@sheffield.ac.uk](mailto:c.relton@sheffield.ac.uk); [mieke.vanhemelrijck@kcl.ac.uk](mailto:mieke.vanhemelrijck@kcl.ac.uk)

1  
2  
3 **32 Abstract**  
4

5 **33 Introduction:** Given the need for more bladder cancer research and the recently observed  
6  
7 **34** advantages of introducing the trials within cohort (TwICs) design, the set-up of the Graham Roberts  
8  
9 **35** Study (Roberts Study) will provide valuable infrastructure to answer a wide variety of research  
10  
11 **36** questions of a clinical, mechanistic, as well as supportive care nature in the area of bladder cancer.  
12  
13

14 **37 Methods:** Using the TwICs design, we will recruit patients aged 18 or older who are willing and able  
15  
16 **38** to provide signed informed consent and have a diagnosis of an active new or recurrent bladder  
17  
18 **39** cancer into this prospective cohort study. All patients have to have a basic understanding of the  
19  
20 **40** English language. The following questionnaires will be collected baseline and every 12 months:  
21  
22 **41** Functional assessment of chronic illness therapy for bladder cancer (FACT-BI), the Functional  
23  
24 **42** assessment of chronic illness therapy-fatigue (FACIT-Fatigue), the Patient health questionnaire-9  
25  
26 **43** (PHQ-9), the Standardised instrument for a generic health status (EQ-5D-5L), a questionnaire to  
27  
28 **44** assess health enhancing physical activity (SQUASH), and the Hertfordshire short questionnaire to  
29  
30 **45** assess diet quality.  
31  
32

33  
34 **46 Ethics and Dissemination:** Due to the nature of this study, we obtained full ethical clearance from  
35  
36 **47** the London - Fulham Research Ethics Committee (17/LO1975). All participants must provide full  
37  
38 **48** informed consent before recruitment onto the study. The results of this study will be published in  
39  
40 **49** peer-reviewed journals and data collected as part of the study will be made available to potential  
41  
42 **50** collaborators on an application basis.  
43  
44  
45

46 **51**  
47  
48 **52 Keywords:** trials within cohorts, bladder cancer, randomised controlled trial, prospective cohort  
49  
50 **53** study  
51  
52

53 **54**

54 **55**

55 **56**

56 **57**  
57  
58  
59  
60

## 58 **Strengths and Limitations**

- 59 1. First trials within cohort (TwiCs) study design for bladder cancer.
- 60 2. TwiCs design generates a of wide variety of research opportunities with limited risk to  
61 patients.
- 62 3. The non-interventional nature of this study means patient participation may not benefit  
63 patients' bladder cancer prognosis or quality of life.

## 65 **Background**

66 Bladder cancer is the 7<sup>th</sup> most common cancer in the UK, with c.10,400 patients diagnosed annually  
67 (1); c. 50% of patients will survive their cancer for 10 years or more after diagnosis. For the majority  
68 of patients, the disease remains indolent following initial treatment, and invasive and burdensome  
69 surveillance is required to mitigate the high risk of recurrence (2). However, there is proportionally  
70 less research into bladder cancer compared to breast, prostate or kidney cancer (3). To provide the  
71 most efficient and high impact research strategy for bladder cancer patients in the UK, we have  
72 established a prospective cohort study of newly diagnosed bladder cancer patients to allow research  
73 that can efficiently address clinical, mechanistic, as well as supportive care related questions.

74  
75 The design of this bladder cancer cohort study is similar to the Utrecht cohort for Multiple BREast  
76 cancer intervention studies and Long-term evaLuAtion (UMBRELLA) (4), which is based on the TwiCs  
77 design introduced by Relton et al. at the University of Sheffield in 2010 (5). It is the first TwiCs design  
78 study in the area of bladder cancer.

79  
80 The use of TwiCs has grown substantially in the last few years, with several new initiatives in the UK.  
81 TwiCs, originally introduced as cohort multiple randomised controlled trial design, was introduced to  
82 address the problems associated with existing approaches for trials informing routine clinical

1  
2  
3 83 practice(5). Such shortcomings relate to recruitment, ethics, patient preferences and treatment  
4  
5 84 comparisons. At least six TwiCs studies are currently ongoing in the UK (6).  
6  
7  
8  
9

10 86 The Roberts Study will serve as a facility for multiple trials and follows the TwiCs design.  
11  
12 87  
13

14 88 The main objectives of the Graham Roberts study (Roberts Study) are:

- 15  
16 89
- 17 • To create a prospective cohort study of well-characterised bladder cancer patients, which  
18 provides the opportunity to conduct a variety of observational studies.  
19 90
  - 20 • To create the infrastructure for future RCTs that will allow more efficient recruitment using  
21 91 patient-centred informed consent  
22 92  
23  
24  
25  
26  
27

## 28 94 **Methods/Design**

### 29 95 *TwicCs design*

30 96 The TwiCs design can be described as follows: Firstly, a large observational cohort of patients with  
31  
32 97 the condition of interest is recruited and their outcomes regularly measured. Then for each  
33  
34 98 randomised controlled trial (RCT), information from the cohort is used to identify all eligible  
35  
36 99 patients. Some eligible patients are randomly selected and offered the trial intervention. The  
37  
38 100 outcomes of these randomly selected patients are then compared with the outcomes of eligible  
39  
40 101 patients not randomly selected, that is, those receiving usual care. This process can be repeated for  
41  
42 102 further randomised controlled trials (5).  
43  
44  
45  
46  
47  
48  
49

50 104 The recruitment and regular follow-up of a large cohort of patients are characteristics of longitudinal  
51  
52 105 observational studies. In the TwiCs design, however, all patients in the cohort consent at the outset  
53  
54 106 to provide data to be used to look at the benefits of treatments for the condition of interest. The  
55  
56 107 capacity for multiple RCTs over time using patients from the same cohort is unique to the TwiCs  
57  
58 108 design. Random selection of some eligible cohort patients, the comparison of their outcomes with  
59  
60

1  
2  
3 109 the outcomes in eligible patients not randomly selected and the similarity of the patient-centred  
4  
5 110 informed consent approach to real life situations offer solutions to the ethical criticisms of  
6  
7 111 randomised consent designs (5).  
8  
9

10 112

11  
12 113 *The Graham Roberts Study*  
13

14 114 Patients will be recruited at Guy's and St Thomas' (GSTT) NHS Foundation Trust, London, UK. All

15  
16 115 patients will be eligible for the study following their first visit for a new or recurrent bladder cancer

17  
18 116 diagnosis. Patients with limited understanding of the English language and patients under the age of

19  
20 117 18 years are ineligible. Since Guy's and St Thomas NHS Foundation Trust is a referral centre, the

21  
22 118 Roberts Study will include patients from various secondary and tertiary hospitals located across the

23  
24 119 United Kingdom. Each year, approximately 100 eligible patients visit the Urology Centre of GSTT for

25  
26 120 bladder cancer management.  
27  
28  
29

30 121

31  
32 122 All eligible patients who have already undergone diagnostic investigations and been informed about

33  
34 123 a (highly likely) bladder cancer will receive detailed written information about the Roberts Study

35  
36 124 whilst attending the Urology Centre for their initial appointment. They will be scheduled to see a

37  
38 125 member of the direct clinical care team and a research nurse/assistant 30 minutes prior to their first

39  
40 126 appointment with the Consultant (urology or oncology). During this research consultation, the

41  
42 127 research nurse/assistant will explain the study in detail and written informed consent will be

43  
44 128 obtained from those who agree to participate. Such consent will be gained to allow:  
45  
46  
47

48 129 • Participation in the Graham Robert's Study cohort and longitudinal study;

49  
50 130 • The participant to be approached to participate in the intervention arm of any future

51  
52 131 randomised control trial;

53  
54 132 • The participant to be randomised to the control arm of any future randomised control trial

55  
56 133 without knowledge of this status.  
57  
58  
59  
60

- 1  
2  
3 134 • Collection and storage of participants biological samples, including blood, urine and tissue,  
4  
5 135 within the KHP Bladder Cancer Biobank;  
6  
7  
8 136 • Linkage and use of participants routinely collected clinical data as recorded in electronic  
9  
10 137 patient records.  
11

12 138

13  
14 139 At the time of full informed consent, the patients will also be provided with the study baseline  
15  
16 140 questionnaire and asked to complete this at a convenient time.  
17

18  
19 141

20  
21 142 For those eligible patients who have not yet been informed about their bladder cancer diagnosis at  
22  
23 143 the time of visiting the Urology Centre, detailed written information about the Roberts Study will be  
24  
25 144 provided by a research nurse/assistant after they have met with the consultant. If the patients are  
26  
27 145 not ready to discuss this study in further detail at this point, a follow-up call will be made one week  
28  
29 146 later to obtain their consent, if they have agreed to participate. Full written informed consent is  
30  
31 147 subsequently obtained at the patients next clinical appointment.  
32  
33

34 148

35  
36 149

37  
38  
39 150 Data from all patients may be used for observational studies in the Roberts Study, but only those  
40  
41 151 who provide consent for randomisation are eligible for participation in the RCTs within the Roberts  
42  
43 152 Study.  
44

45  
46 153

47  
48 154 Thus, the TwiCs design is based on an “asymmetric informed consent”. After recruitment into the  
49  
50 155 Roberts cohort, randomisation of eligible subjects, can be followed by an asymmetric treatment of  
51  
52 156 the two arms; those selected for the experimental arm provide informed consent for the  
53  
54 157 intervention trial, while the data from the control arm are used based on prior broad permission.  
55

56  
57 158 Hence, the cohort participants are informed about future research within the cohort.  
58

59 159  
60

1  
2  
3 160 *Selection and withdrawal of subjects*  
4

5 161 Patients eligible to participate in this study are those who meet all of the following inclusion criteria:  
6

- 7 162
- 8 • Appointment for a new or recurrent diagnosis of bladder cancer at Guy's and St Thomas' NHS  
9 Foundation Trust
  - 10 163
  - 11 164 • Minimum age of 18 years
  - 12 165 • Basic understanding of English
  - 13
  - 14
  - 15
  - 16
  - 17 166

18  
19 167 Patients will be identified in multi-disciplinary team meetings or in out-patient clinics by the clinical  
20 team, in collaboration with the research nurse. Participants have the right to withdraw from the  
21 168 study at any time for any reason. Their routine medical and surgical care will not be affected.  
22 169  
23  
24  
25

26 170

27  
28 171 *Expected duration of the study and sample size*  
29

30 172 As this study is an observational prospective cohort study, it is difficult to estimate its duration. We  
31 aim to recruit a minimum of 400 patients over a period of 5 years, though there is no limit to the  
32 173 number of patients needed for a prospective cohort study. Moreover, over time new research  
33 174 opportunities will develop and potential funding may become available to continue recruitment into  
34 175 the Roberts Study. Patients will be followed up for life through data linkages with Hospital Episode  
35 176 Statistics (HES), the Office for National Statistics (ONS) and electronic patient records.  
36 177  
37  
38  
39  
40  
41  
42

43 178 As this is a prospective cohort study, with no specific primary research question, it is not possible to  
44 179 perform sample size calculations. However, it is still important to consider recruitment rates and  
45 180 response rates to the questionnaires.  
46  
47  
48  
49

50 181 At the point of submission of this protocol (April 2019), 72 bladder cancer patients had provided full  
51 written informed consent for the Graham Robert's Study. Of these 72 patients, 64 had completed  
52 182 and returned their baseline questionnaire. At current rates of consent, the authors would expect  
53 183 baseline recruitment of 400 bladder cancer patients to be complete by 31<sup>st</sup> December 2022.  
54  
55  
56  
57  
58  
59  
60

1  
2  
3 186 *Data collection*  
4

5 187 Within the Roberts Study, various clinical data will be prospectively collected including  
6  
7 188 demographics, tumour characteristics, treatment and CT and MRI imaging data. Clinical data will be  
8  
9 189 captured from electronic medical records, referral letters and annual reports for Public Health  
10  
11  
12 190 England.  
13

14 191

15  
16 192 Socio-demographic data will include sex, date of birth, age at diagnosis, highest level of education,  
17  
18 193 postal code (to estimate the deprivation index), body mass index (BMI) and WHO performance  
19  
20 194 status.  
21  
22

23 195

24  
25 196 The following tumour characteristics will be collected: TNM stage, grade, tumour diameter, number  
26  
27 197 of tumours, histology and morphological codes and invasiveness.  
28  
29

30 198

31  
32 199 Treatment characteristics comprise data on type and timing of treatment given (e.g. intravesical  
33  
34 200 instillations, systemic chemotherapy, radical cystectomy, radiotherapy or other treatments).  
35

36 201 Additional detailed data, as reported in surgical notes, will be available for those bladder cancer  
37  
38 202 patients who undergo radical cystectomy. Table 1 illustrates the pre-, peri- and postoperative  
39  
40 203 variables which will be collected for this patient subset.  
41  
42

43 204  
44

|                                                                                              |                                                                                                                                |                                                                                                                                                                                                         |
|----------------------------------------------------------------------------------------------|--------------------------------------------------------------------------------------------------------------------------------|---------------------------------------------------------------------------------------------------------------------------------------------------------------------------------------------------------|
| 45<br>46<br>47<br>48<br>49<br>50<br>51<br>52<br>53<br>54<br>55<br>56<br>57<br>58<br>59<br>60 | <p><b>Table 1:</b> Data collection for those participants of the Roberts Study undergoing radical cystectomy. Preoperative</p> | <p>TNM stage, weight, height, BMI, American Society of Anesthesiologists (ASA) score, previous pelvic surgery, radiation or neoadjuvant chemotherapy</p>                                                |
|                                                                                              | <p>Perioperative</p>                                                                                                           | <p>Type of surgery, type of lymphadenectomy, type of urinary diversion, blood loss, duration of surgery, accidental organ injury during surgery</p>                                                     |
|                                                                                              | <p>Postoperative</p>                                                                                                           | <p>Complications (Clavien-Dindo), re-operations and re-admissions within 90 days, length of hospital stay, pT stage, number of excised lymph nodes and number of excised and metastatic lymph nodes</p> |



1  
2  
3 206 Information on disease progression, recurrence and survival will be collected annually by means of  
4  
5 207 the data linkages with HES, ONS and electronic patient records. We will also collect patient-reported  
6  
7 208 outcome measures (PROMs) by means of validated questionnaires designed to quantify health-  
8  
9 209 related Quality of Life (QoL) from the patients' perspective. These questionnaires will be given  
10  
11 210 (paper (post) or digital (email or tablet in clinic)) to patients upon entry into the cohort (baseline)  
12  
13  
14 211 and every 12 months thereafter with a total follow-up of at least 10 years. It will take about 30  
15  
16 212 minutes to fill out the set of questionnaires at each time point.  
17  
18

19 213  
20  
21 214 PROMs will be collected on QoL, fatigue, anxiety and depression, physical activity, dietary habits as  
22  
23 215 well as risk behaviour in terms of known bladder cancer risk factors. Following an assessment of  
24  
25 216 smoking behaviour, alcohol consumption and occupational bladder cancer risk factors, the following  
26  
27 217 validated questionnaires will be used (see Additional File 1):  
28  
29

- 30 218
- 31  
32 219 • **Quality of Life:** Functional assessment of chronic illness therapy for bladder cancer (FACT-BI  
33  
34 220 (7))
  - 35  
36 221 • **Fatigue:** Functional assessment of chronic illness therapy-fatigue (FACIT-Fatigue (8))
  - 37  
38 222 • **Depression:** Patient health questionnaire-9 (PHQ-9 (9))
  - 39  
40 223 • **Health :** Standardised instrument for use as a measure of health outcome (EQ-5D-5L(10))
  - 41  
42 224 • **Physical activity:** Questionnaire to assess health enhancing physical activity (SQUASH (11))
  - 43  
44 225 • **Assessment of dietary habits:** Short questionnaire to assess diet quality (12)
  - 45  
46 226

47  
48 227 *Assessment of safety*  
49  
50

51  
52 228 As this is a prospective cohort study with no specific interventions, adverse events (AEs) are unlikely  
53  
54 229 to take place. Nevertheless, if filling out questionnaire data should ever result in an AE, it will be  
55  
56 230 graded according to the NCI Common Terminology Criteria for Adverse Events (CTCAE) Version 4.0  
57  
58 231 and coded. These will be reported to the Data Monitoring Committee.  
59  
60

1  
2  
3 232 Given that we see on average about 100 eligible patients per year, we expect to recruit at least 400  
4  
5 233 patients over a period of five years. However, as described above, if more research and/or funding  
6  
7 234 opportunities come up, we will continue recruitment into the Roberts study.  
8  
9

10 235

### 11 236 *Patient and Public Engagement*

12  
13  
14 237 The development of the Graham Roberts Study was informed in collaboration with patient  
15  
16 238 representatives diagnosed and treated at Guy's and St Thomas' NHS Foundation Trust. Prior to  
17  
18 239 development of the study protocol, a focus group was held to discuss the acceptability of the TwiCs  
19  
20 240 study design and the content of the self-administered questionnaire. Patients of similar bladder  
21  
22 241 cancer diagnoses to those that will be consented onto the study were recruited into this focus  
23  
24 242 group. Based on the patient's experiences and preferences, the Graham Roberts Study design was  
25  
26 243 agreed. Results of the study will be disseminated to the patients through annual newsletters and on  
27  
28 244 a study specific website for patients.  
29  
30

31 245

### 32 246 *Direct Access to Source Data and Documents*

33  
34  
35 247 The Investigator will prepare and maintain adequate and accurate source documents designed to  
36  
37 248 record all observations and other pertinent data for each patient in the Roberts Study. Study  
38  
39 249 personnel will enter data from source documents corresponding to a patient's visit into the  
40  
41 250 protocol-specific electronic case report forms (CRFs) in a dedicated, secure data warehouse. Patients  
42  
43 251 will not be identified by name in the study database or on any study documents to be collected by  
44  
45 252 the Sponsor (or Designee), but will be identified by patient ID numbers.  
46  
47

48 253

49  
50  
51 254 The database will be safeguarded against unauthorised access with established security procedures;  
52  
53 255 nightly backup of the database and related software files will be maintained. At pre-specified  
54  
55 256 junctures of the protocol (e.g., production of interim and final reports), data for analysis will be  
56  
57 257 locked and cleaned as per established procedures.  
58  
59  
60

1  
2  
3 258  
4

5 259 If a correction is required to a CRF, the time and date stamps will track the person entering or  
6  
7 260 updating CRF data and create an electronic audit trail. The Chief Investigator is responsible for  
8  
9 261 reviewing all information collected on patients enrolled in this study for completeness and accuracy.  
10  
11

12 262  
13

14 263 To enable evaluations and/or audits from regulatory authorities, the CI agrees to keep records,  
15  
16 264 including the identity of all participating subjects (sufficient information to link records, e.g. CRFs  
17  
18 265 and hospital records), all original signed informed consent forms, safety reporting forms, source  
19  
20 266 documents and detailed records of treatment disposition and adequate documentation of relevant  
21  
22 267 correspondence (e.g. letters, meeting minutes, telephone call reports). The records should be  
23  
24 268 retained by the CI according to the International Conference on Harmonisation (ICH) or local  
25  
26 269 regulations; all study documentation must be retained for 10 years after the study ends.  
27  
28  
29

30 270  
31

### 32 271 *Quality Assurance*

33  
34 272 Monitoring of this study will be to ensure compliance with Good Clinical Practice, and scientific  
35  
36 273 integrity will be managed and oversight retained by the Data Monitoring Committee (DMC) led by Prof  
37  
38 274 Dominique Michaud. The committee will receive notification every 6 months of the interim and total  
39  
40 275 accrual. At the discretion of the chair of the DMC, interim analyses may be scheduled as modifications  
41  
42 276 to the protocol. Additional meetings during the study period may occur at the discretion of the  
43  
44 277 Steering Committee.  
45  
46  
47

48 278  
49

50 279 The study design, analysis and reporting will follow the recent recommendations for good practice in  
51  
52 280 clinical outcomes assessment by the International Society for Pharmacoeconomics and Outcomes  
53  
54 281 Research (ISPOR) (13).  
55  
56

57 282  
58  
59  
60

1  
2  
3 283 *Data handling*  
4

5 284 The Chief Investigator and delegates are responsible for daily cohort management. Data quality will  
6  
7 285 be checked periodically. The following guidelines will be strictly adhered to:

- 8  
9  
10 286
  - Patient data will be anonymised.
  - All anonymised data will be stored on a password protected encrypted computer.
  - All study data will be stored in line with the Data Protection Act as defined in the King's Health  
11  
12  
13  
14  
15  
16  
17  
18  
19  
20  
21  
22  
23  
24  
25  
26  
27  
28  
29  
30  
31  
32  
33  
34  
35  
36  
37  
38  
39  
40  
41  
42  
43  
44  
45  
46  
47  
48  
49  
50  
51  
52  
53  
54  
55  
56  
57  
58  
59  
60

289 Partners' Clinical Trials Office Archiving SOP.  
290 The data will be stored as outlined in the data management plan.

291

292 *Insurance/Indemnity*

293 The co-sponsors King's College London and Guy's and St Thomas' NHS Foundation Trust will provide  
294 insurance and indemnity.

295

296 **Discussion**

297 The Graham Roberts study is the first of its kind and thus the first TwiCs study for bladder cancer. It  
298 generates a wide variety of research opportunities with limited risk to patients. Participation in  
299 research involves some loss of privacy. We will do our best to make sure that all personal  
300 information gathered for this study is kept private. As this is a non-interventional prospective cohort  
301 study, participation may not have a beneficial effect on patients' bladder cancer prognosis or  
302 quality-of-life compared to usual care.

303

304 The questionnaires to be used are quite detailed and, for the most part, concerns day-to-day  
305 activities such as quality and duration of sleep, diet and exercise. The questionnaire does pose some  
306 more personal and intrusive questions however, including questions related to symptoms of  
307 depression. These questions can be omitted if the participant does not feel comfortable answering  
308 them. There is a risk that some participants may be upset by having these questions posed to them.

1  
2  
3 309 Some participants may prefer to complete the questionnaire themselves, whereas others may prefer  
4  
5 310 to do so with a research assistant. Participants will be fully informed about these potential harms  
6  
7 311 and enabled to make an informed decision regarding participation. We consider that the potential  
8  
9 312 minor harms are outweighed by the potential benefits of the research.  
10  
11  
12 313

13  
14 314 Future research using the data in this study could lead to medical and scientific products,  
15  
16 315 discoveries, as well as interventions that improve the prevention, diagnosis and treatment of  
17  
18 316 bladder cancer. A benefit for the patients is also the possibility to be part of future RCTs by providing  
19  
20 317 consent for being part of the intervention arm.  
21  
22  
23 318

#### 24 319 **Trial Status**

25  
26 320 Protocol Version and Number: Version 2, January 2018

27  
28 321 Date of commencement of recruitment: 22<sup>nd</sup> February 2018

29  
30 322 Projected date of recruitment completion: 28<sup>th</sup> October 2022  
31  
32 323

#### 33 324 **Ethics and Dissemination**

34  
35 325 The study will be conducted in compliance with the principles of the Declaration of Helsinki (1996),  
36  
37 326 the principles of GCP, and in accordance with all applicable regulatory requirements including but  
38  
39 327 not limited to the Research Governance Framework and the Medicines for Human Use (Clinical Trial)  
40  
41 328 Regulations 2004, as amended in 2006 and any subsequent amendments. This protocol and related  
42  
43 329 documents were approved by the London – Fulham Research Ethics Committee (REC) as part of  
44  
45 330 gaining Health Research Authority (HRA) approval (17/LO/1975).  
46  
47  
48 331

49  
50 332 After completion of an RCT within the Roberts Study, all patients – irrespective of participation in the  
51  
52 333 specific study – will receive aggregated results via a newsletter that they can subscribe to at time of  
53  
54  
55  
56  
57  
58  
59  
60

1  
2  
3  
4  
5  
6  
7  
8  
9  
10  
11  
12  
13  
14  
15  
16  
17  
18  
19  
20  
21  
22  
23  
24  
25  
26  
27  
28  
29  
30  
31  
32  
33  
34  
35  
36  
37  
38  
39  
40  
41  
42  
43  
44  
45  
46  
47  
48  
49  
50  
51  
52  
53  
54  
55  
56  
57  
58  
59  
60

334 initial consent. All results associated with this study will be published in journals as peer-reviewed  
335 articles.

For peer review only

## References

1. Cancer Research UK. Bladder Cancer Facts 2017 [Available from: <http://www.cancerresearchuk.org/about-cancer/bladder-cancer/about>].
2. Crawley D, Rudman S. Epidemiology of Bladder Cancer. In: Loda M, Mucci L, Mittelstadt M, Van Hemelrijck M, Cotter M, editors. *Pathology and Epidemiology of Cancer*: Springer; 2016.
3. Boormans JL, Zwarthoff EC. Limited Funds for Bladder Cancer Research and What Can We Do About It. *Bladder Cancer*. 2016;2(1):49-51.
4. Young-Afat DA, van Gils CH, van den Bongard H, Verkooijen HM, Group US. The Utrecht cohort for Multiple BREast cancer intervention studies and Long-term evaLuAtion (UMBRELLA): objectives, design, and baseline results. *Breast cancer research and treatment*. 2017.
5. Relton C, Torgerson D, O'Cathain A, Nicholl J. Rethinking pragmatic randomised controlled trials: introducing the "cohort multiple randomised controlled trial" design. *BMJ*. 2010;340:c1066.
6. Relton C. Trials within Cohorts 2017 [Available from: <https://www.twics.global/use-of-the-design>].
7. Cella D. *Manual of the Functional Assessment of Chronic Illness Therapy (FACIT) Scales Version 4.0*. 1997.
8. Lai JS, Cella D, Chang CH, Bode RK, Heinemann AW. Item banking to improve, shorten and computerize self-reported fatigue: an illustration of steps to create a core item bank from the FACIT-Fatigue Scale. *Qual Life Res*. 2003;12(5):485-501.
9. Kroenke K, Spitzer RL, Williams JB. The PHQ-9: validity of a brief depression severity measure. *J Gen Intern Med*. 2001;16(9):606-13.
10. Herdman M, Gudex C, Lloyd A, Janssen M, Kind P, Parkin D, et al. Development and preliminary testing of the new five-level version of EQ-5D (EQ-5D-5L). *Qual Life Res*. 2011;20(10):1727-36.
11. Wendel-Vos GC, Schuit AJ, Saris WH, Kromhout D. Reproducibility and relative validity of the short questionnaire to assess health-enhancing physical activity. *J Clin Epidemiol*. 2003;56(12):1163-9.
12. Robinson SM, Jameson KA, Bloom I, Ntani G, Crozier SR, Syddall H, et al. Development of a Short Questionnaire to Assess Diet Quality among Older Community-Dwelling Adults. *J Nutr Health Aging*. 2017;21(3):247-53.
13. Walton MK, Powers JH, 3rd, Hobart J, Patrick D, Marquis P, Vamvakas S, et al. *Clinical Outcome Assessments: Conceptual Foundation-Report of the ISPOR Clinical Outcomes Assessment - Emerging Good Practices for Outcomes Research Task Force*. *Value in health : the journal of the International Society for Pharmacoeconomics and Outcomes Research*. 2015;18(6):741-52.

### Additional Files

Additional File 1 – Graham Roberts Study Questionnaire (doc).

The questionnaire given to patients who have consented to the Graham Roberts Study.

### List of abbreviations

|          |                                                                     |
|----------|---------------------------------------------------------------------|
| AE       | Adverse events                                                      |
| ASA      | American Society of Anesthesiologists                               |
| BMI      | Body Mass Index                                                     |
| CI       | Chief Investigator                                                  |
| CRF      | Case Research Form                                                  |
| CTCAE    | Common Terminology Criteria for Adverse Events                      |
| DMC      | Data Monitoring Committee                                           |
| EQ-5D-5L | Standardised instrument for use as a measure of health outcome      |
| FACT-BI  | Functional assessment of chronic illness therapy for bladder cancer |
| FACIT    | Functional assessment of chronic illness therapy - fatigue          |
| GCP      | Good Clinical Practice                                              |
| GSTT     | Guy's and St Thomas'                                                |
| HES      | Hospital Episode Statistics                                         |
| HRA      | Health Research Authority                                           |
| ICH      | International Conference on Harmonisation                           |
| ISPOR    | International Society for Pharmacoeconomics and Outcomes Research   |
| KCL      | King's College London                                               |
| NHS      | National Health Services                                            |
| ONS      | Office National Statistics                                          |
| PHQ-9    | Patient health questionnaire-9                                      |
| PI       | Principle Investigator                                              |
| PROMS    | Patient-reported outcomes                                           |
| QoL      | Quality of Life                                                     |
| RCT      | Randomise Clinical Trial                                            |
| REC      | Research Ethics Committee                                           |
| SOP      | Standard Operating Procedures                                       |
| SQUASH   | Questionnaire to assess health enhancing physical activity          |
| TriCs    | Trials within Cohorts                                               |
| UK       | United Kingdom                                                      |
| WHO      | World Health Organisation                                           |



## Declarations

### *Ethics approval and consent to participate*

The Fulham Research Ethics Committee approved the Graham Roberts Study on 22/02/2018 (Reference number: 17/LO/1975).

### *Consent for publication*

Not applicable.

### *Availability of data and material*

Data sharing is not applicable to this article as no datasets were generated or analysed during the current study.

### *Competing interests*

The authors declare that they have no competing interests.

### *Funding*

Funding to conduct the study is kindly provided by the Graham and Dianne Roberts Charitable Settlement. The funders had no role in the design of the study and collection, analysis, and interpretation of data nor in writing of the manuscript.

### *Authors' contributions*

MVH, FC, HW, CR, CM, and AS designed the study with input from their clinical colleagues (SC, SH, SR, DE, DJ, RB, SA, KC, SK) and the biobank coordinator (CG). All authors read and approved the final manuscript.

### *Acknowledgements*

We would like to thank our funder as well as all the patients who will contribute to the Graham Roberts Study. We would also like to extend our thanks to the patients who took part in the focus groups and informed the development of the Graham Roberts Study.

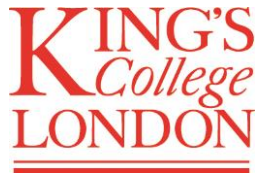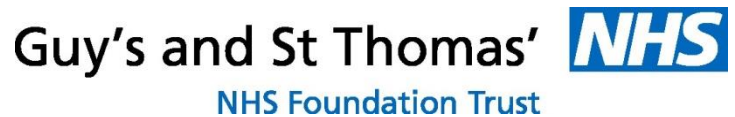

# Graham Roberts Study (Roberts Study)

## Patient Questionnaire

Through the Roberts Study, we are learning about why some bladder cancers respond better to treatment than others. This will help us to develop new and better ways of predicting recurrence and progression of bladder cancer in the future, as well as new interventions that can improve quality and quantity of life. Your participation is a critical contribution toward this goal.

This questionnaire is confidential. We will be taking every step to ensure that your answers to the interview questions are stored securely and are not shared with anyone outside the study team.

If you need any help with any of the questions, please feel free to ask the study team.

**Participant number:** \_\_\_\_\_

**Date of Birth:** \_\_\_\_\_

**Date of Questionnaire:** \_\_\_\_\_

Is this the first time you have filled in this questionnaire? Yes/No

*If this is not the first time you have filled in the questionnaire, please skip **section 1 and 2** and proceed immediately to **section 3** below.*

**Section 1 – Personal details and medical history**

**1. How would you describe your race / ethnic background?**

White/Caucasian  Black/Afro-Caribbean  Asian  Other

If other, please specify.....

**2. What is your current marital status?**

Married  Divorced/Separated  Widowed  Never married

**3. What is your current living arrangement?**

Alone  With partner  With other family

Assisted Living  Nursing Home  Other

**4. What is your current work status?**

Full-time  Part-time  Retired

Disabled  Unemployed

**5. What is your highest level of education?**

Primary school  Higher education (e.g. University)

Secondary school  Other

For the following questions please circle or tick the appropriate answer:

6. Have you ever had any type of cancer (except for non-melanoma skin cancer)?

YES NO

If you answered yes, please specify: \_\_\_\_\_

7. Were any of your immediate blood relatives, that is, your mother, or father, or sister(s), or brother(s), or son(s), or daughter(s), ever diagnosed as having any type of cancer?

- Yes
- No – please continue to question 8
- I prefer not to answer
- I don't know

Who was/were diagnosed as having cancer, that is, what was his or her relationship to you?

- Mother
- Father
- Brother(s)
- Sister(s)
- Son(s)
- Daughter(s)
- I prefer not to answer
- I don't know

You indicated that at least one of your immediate blood relatives was diagnosed with cancer. Was he/she, or at least one of them (if more than one), diagnosed with **bladder cancer**?

- Yes
- No
- I prefer not to answer
- I don't know

8. Did you ever have a bladder infection with at least one of the following symptoms: frequent urination or pain or burning when urinating?

- Yes
- No
- I prefer not to answer
- I don't know

How many times did you have this kind of infection? Would you say:

- 1 or 2 times,
- 3 or 5 times,
- 6 or 10 times,
- 11 or more times?
- I prefer not to answer
- I don't know

How old were you when you first had this type of infection?

When I was \_\_\_\_\_ years old

- I prefer not to answer
- I don't know

**9. Did you ever have a kidney infection diagnosed by a physician?**

- Yes
- No
- I prefer not to answer
- I don't know

How many times did you have this kind of infection? Would you say:

- 1 or 2 times,
- 3 or 5 times,
- 6 or 10 times,
- 11 or more times?
- I prefer not to answer
- I don't know

**10. Before 1 year ago, did you ever have renal or nephritic colic, or kidney or renal stones?**

- Yes
- No
- I prefer not to answer
- I don't know

**11. Before 1 year ago, did you ever have urinary bladder stones?**

- Yes
- No
- I prefer not to answer
- I don't know

**12. Before 1 year ago, did you ever have a growth removed from your urinary bladder?**

- Yes
- No
- I prefer not to answer
- I don't know

**13. Did you ever have any of the following symptoms when urinating: difficulty starting, difficulty stopping or increased frequency during the night?**

- Yes
- No
- I prefer not to answer
- I don't know

**14. If you are a man, please answer the following question: Did your doctor ever tell you that you had an enlarged prostate?**

- Yes
- No
- I prefer not to answer
- I don't know

1  
2 **[Women only]** The next group of questions are about your reproductive history. Firstly,  
3 how old were you when you had your first menstrual period?  
4

5  years old  
6

- 7  I prefer not to answer  
8  I don't know  
9

10 Have you had at least one menstrual period in the past 12 months?  
11

- 12  Yes  
13  No  
14  I prefer not to answer  
15  I don't know  
16

17 Are you pregnant or breastfeeding?  
18

- 19  Yes  
20  No  
21  I prefer not to answer  
22  I don't know  
23

24 Have you had surgery to remove your uterus (hysterectomy)?  
25

- 26  Yes  
27  No  
28  I prefer not to answer  
29  I don't know  
30

31 Have you had any of your ovaries surgically removed (oophorectomy)?  
32

- 33  Yes  
34  No  
35  I prefer not to answer  
36  I don't know  
37

38 How many of your ovaries were removed?  
39

- 40  One  
41  Both  
42  I prefer not to answer  
43  I don't know  
44

45 Have you ever taken birth control pills?  
46

- 47  Yes  
48  No  
49  I prefer not to answer  
50  I don't know  
51

52 At what age did you first start taking birth control pills?  
53

54 \_\_\_\_\_ year old  
55  I prefer not to answer  
56  I don't know  
57

58 How long did you take birth control pills?  
59

60 \_\_\_\_\_ years \_\_\_\_\_ months  
 I prefer not to answer  
 I don't know

1 How many times have you been pregnant?

- 2  Never
- 3  \_\_\_\_\_ times
- 4  I prefer not to answer
- 5  I don't know
- 6
- 7

8 How many of your pregnancies ended in a live birth?

9

- 10 \_\_\_\_\_
- 11  I prefer not to answer
- 12  I don't know
- 13
- 14
- 15
- 16
- 17
- 18
- 19
- 20
- 21
- 22
- 23
- 24
- 25
- 26
- 27
- 28
- 29
- 30
- 31
- 32
- 33
- 34
- 35
- 36
- 37
- 38
- 39
- 40
- 41
- 42
- 43
- 44
- 45
- 46
- 47
- 48
- 49
- 50
- 51
- 52
- 53
- 54
- 55
- 56
- 57
- 58
- 59
- 60

**Section 2 – History of tobacco consumption****Please tick the most appropriate answer:**

1  
2  
3  
4  
5  
6  
7  
8  
9  
10  
11  
12  
13  
14  
15  
16  
17  
18  
19  
20  
21  
22  
23  
24  
25  
26  
27  
28  
29  
30  
31  
32  
33  
34  
35  
36  
37  
38  
39  
40  
41  
42  
43  
44  
45  
46  
47  
48  
49  
50  
51  
52  
53  
54  
55  
56  
57  
58  
59  
60

1. **During your entire lifetime, have you smoked a total of 100 cigarettes or more, which is 5 or more packs?**

- Yes
- No
- I prefer not to answer
- I don't know

2. **Did you ever smoke cigarettes regularly, that is, at least one per day for six months or longer?**

- Yes
- No
- I prefer not to answer
- I don't know

3. **Think about all the years that you smoked cigarettes, how many cigarettes per day did you usually smoke?**

- Less than one
- \_\_\_\_\_
- [please enter a number if it is more than 1, but less than 95]
- More than 95
- I prefer not to answer
- I don't know

4. **How old were you when you first started smoking at least one cigarette per day?**  
years old

- I prefer not to answer
- I don't know

5. **How old were you when you last smoked cigarettes?**

\_\_\_\_\_ years old

- I still smoke
- I refuse to answer
- I don't know

6. **When you smoked cigarettes, would you say that you usually inhaled only into your mouth, into your mouth and throat or into your chest?**

- Mouth only
- Mouth and throat
- Chest
- I do not inhale
- Cannot say, but not deeply into the chest
- I prefer not to answer
- I don't know

7. **Have you ever smoked at least one cigar per week for six months or longer?**

- Yes
- No
- I prefer not to answer
- I don't know



**8. How old were you when you first started smoking at least one cigar per week?**

\_\_\_\_\_ years old

- I refuse to answer  
 I don't know

**9. How old were you when you last smoked cigars?**

\_\_\_\_\_ years old

- I still smoke cigars  
 I refuse to answer  
 I don't know

**10. For how many years altogether have you smoked/did you smoke cigars? Please do not include any periods during which you may have quit.**

\_\_\_\_\_ years \_\_\_\_\_ months

- I don't know  
 I prefer not to answer

**11. Thinking about all the years that you smoked cigars, how many cigars did you usually smoke in a week?** Less than one \_\_\_\_\_

[please enter a number if it is more than 1 but less than 95]

- More than 95  
 I refuse to answer  
 I don't know

**12. Have you ever smoked at least one pipe of tobacco per week for six months or longer?**

- Yes  
 No  
 I prefer not to answer  
 I don't know

**13. How old were you when you first started smoking at least one pipe of tobacco per week?**

\_\_\_\_\_ years old

- I refuse to answer  
 I don't know

**14. How old were you when you last smoked a pipe?**

\_\_\_\_\_ years old

- I still smoke a pipe  
 I refuse to answer  
 I don't know

### Section 3 – Current medical conditions and medications

#### 1. Have you been diagnosed with any of the following medical conditions?'

|                                          |     |    |
|------------------------------------------|-----|----|
| (a) High blood pressure                  | YES | NO |
| (b) Diabetes mellitus                    | YES | NO |
| (c) High cholesterol                     | YES | NO |
| (d) Myocardial infarction (heart attack) | YES | NO |
| (e) Angina pectoris                      | YES | NO |
| (f) Atrial fibrillation                  | YES | NO |
| (g) Congestive heart failure             | YES | NO |

#### 2. Have you regularly taken any of these medications *in the last two years?*

##### (a) Non-steroidal anti-inflammatory drugs (NSAIDs)

|                                                        |     |    |
|--------------------------------------------------------|-----|----|
| (i) Aspirin                                            | YES | NO |
| (ii) Ibuprofen (e.g. Advil, Nurofen, Nuprin, Medipren) | YES | NO |
| (iii) Other: _____                                     | YES | NO |

##### (b) "Statin" cholesterol-lowering drugs

|                                               |     |    |
|-----------------------------------------------|-----|----|
| (i) Lovastatin (e.g. Mevacor, Altacor)        | YES | NO |
| (ii) Simvastatin (e.g. Zocor)                 | YES | NO |
| (iii) Pravastatin (e.g. Pravachol, Pravigard) | YES | NO |
| (iv) Atorvastatin (e.g. Lipitor)              | YES | NO |
| (v) Other: _____                              | YES | NO |

##### (c) Beta blocker drugs

|                                         |     |    |
|-----------------------------------------|-----|----|
| (i) Metoprolol (e.g. Lopressor, Toprol) | YES | NO |
| (ii) Atenolol (e.g. Tenormin)           | YES | NO |
| (iii) Nadolol (e.g. Corgard)            | YES | NO |
| (iv) Other: _____                       | YES | NO |

**(d) Antidepressants: Selective serotonin reuptake inhibitors (SSRIs)**

|                                  |     |    |
|----------------------------------|-----|----|
| (i) Citalopram (e.g. Celexa)     | YES | NO |
| (ii) Escitalopram (e.g. Lexapro) | YES | NO |
| (iii) Fluoxetine (e.g. Prozac)   | YES | NO |
| (iv) Paroxetine (e.g. Paxil)     | YES | NO |
| (v) Sertraline (e.g. Zoloft)     | YES | NO |
| (vi) Fluvoxamine (e.g. Luvox)    | YES | NO |
| (vii) Other: _____               | YES | NO |

**(e) Other antidepressants**

|                                        |     |    |
|----------------------------------------|-----|----|
| (i) Amitriptyline (e.g. Elavil, Endep) | YES | NO |
| (ii) Imipramine (e.g. Tofranil)        | YES | NO |
| (iii) Nortriptyline (e.g. Pamelor)     | YES | NO |
| (iv) Other: _____                      | YES | NO |

**(f) Sleeping tablets**

|                                      |     |    |
|--------------------------------------|-----|----|
| (i) Diazepam (e.g. Valium)           | YES | NO |
| (ii) Alprazolam (e.g. Xanax)         | YES | NO |
| (iii) Lorazepam (e.g. Ativan)        | YES | NO |
| (iv) Chlordiazepoxide (e.g. Librium) | YES | NO |
| (v) Other: _____                     | YES | NO |

**(g) Diabetes medications**

|                                    |     |    |
|------------------------------------|-----|----|
| (i) Insulin                        | YES | NO |
| (ii) Metformin                     | YES | NO |
| (iii) Rosiglitazone (e.g. Avandia) | YES | NO |
| (iv) Pioglitazone (e.g. Actos)     | YES | NO |
| (v) Other: _____                   | YES | NO |

**(h) Are you on any other long-term medication?** \_\_\_\_\_

**Section 4 – Current smoking behaviour, alcohol consumption and other environmental/occupational exposures**

**Please circle the most appropriate answer:**

1. **Do you currently smoke cigarettes, a pipe or cigars? If you answered YES, how many cigarettes, pipe refills or cigars do you smoke per day?**

| Currently smoke?          | Cigarettes |    | Pipe       |    | Cigars     |    |
|---------------------------|------------|----|------------|----|------------|----|
|                           | YES        | NO | YES        | NO | YES        | NO |
| If yes, how many per day? | 1-4        |    | 1-4        |    | 1-4        |    |
|                           | 5-14       |    | 5-10       |    | 5-10       |    |
|                           | 15-24      |    | 10 or more |    | 10 or more |    |
|                           | 25-34      |    |            |    |            |    |
|                           | 35-44      |    |            |    |            |    |
|                           | 45 or more |    |            |    |            |    |

2. **In a typical week over the past three months, on how many days did you consume an alcoholic drink of any type?**

*No days*                      *1 day per week*                      *2 days per week*                      *3 days per week*  
*4 days per week*                      *5 days per week*                      *6 days per week*                      *7 days per week*

3. **In a typical month, what is the largest number of drinks of beer, wine and / or spirits you have in one day?**

*None*                      *1-2 drinks per day*                      *3-5 drinks per day*  
*6-9 drinks per day*                      *10-14 drinks per day*                      *15 or more drinks per day*

4. **On a typical day, what is the total number of alcoholic and non-alcoholic drinks combined you have in one day?**

*1-2 pints per day*                      *3-5 pints per day*  
*6-9 pints per day*                      *10-14 pints per day*                      *15 or more pints per day*

5. **On a typical day, how many cups of coffee do you drink in one day?**

*None*                      *1-2 cups per day*                      *3-5 cups per day*  
*6-9 cups per day*                      *10 or more cups per day*

6. **Have you ever worked in the production of rubber or aluminium or were you exposed to aromatic amines (eg. printing or dye industry) for five years or more?**

YES                      NO

7. **Do you get your drinking water from a private well?**                      YES                      NO

**Section 5 – Quality of Life (FACT-BI)**

Below is a list of statements that other people have said are important. **Please circle or mark one number per line to indicate your response as it applies to the past 7 days.**

**PHYSICAL WELL-BEING**

|     |                                                                                       | Not at all | A little bit | Some-what | Quite a bit | Very much |
|-----|---------------------------------------------------------------------------------------|------------|--------------|-----------|-------------|-----------|
| GP1 | I have a lack of energy.....                                                          | 0          | 1            | 2         | 3           | 4         |
| GP2 | I have nausea.....                                                                    | 0          | 1            | 2         | 3           | 4         |
| GP3 | Because of my physical condition, I have trouble meeting the needs of my family ..... | 0          | 1            | 2         | 3           | 4         |
| GP4 | I have pain.....                                                                      | 0          | 1            | 2         | 3           | 4         |
| GP5 | I am bothered by side effects of treatment.....                                       | 0          | 1            | 2         | 3           | 4         |
| GP6 | I feel ill.....                                                                       | 0          | 1            | 2         | 3           | 4         |
| GP7 | I am forced to spend time in bed.....                                                 | 0          | 1            | 2         | 3           | 4         |

**SOCIAL/FAMILY WELL-BEING**

|     |                                                                                                                                                                                                             | Not at all | A little bit | Some-what | Quite a bit | Very much |
|-----|-------------------------------------------------------------------------------------------------------------------------------------------------------------------------------------------------------------|------------|--------------|-----------|-------------|-----------|
| GS1 | I feel close to my friends.....                                                                                                                                                                             | 0          | 1            | 2         | 3           | 4         |
| GS2 | I get emotional support from my family .....                                                                                                                                                                | 0          | 1            | 2         | 3           | 4         |
| GS3 | I get support from my friends .....                                                                                                                                                                         | 0          | 1            | 2         | 3           | 4         |
| GS4 | My family has accepted my illness.....                                                                                                                                                                      | 0          | 1            | 2         | 3           | 4         |
| GS5 | I am satisfied with family communication about my illness .....                                                                                                                                             | 0          | 1            | 2         | 3           | 4         |
| GS6 | I feel close to my partner (or the person who is my main support) .....                                                                                                                                     | 0          | 1            | 2         | 3           | 4         |
| Q1  | <i>Regardless of your current level of sexual activity, please answer the following question. If you prefer not to answer it, please mark this box <input type="checkbox"/> and go to the next section.</i> |            |              |           |             |           |
| GS7 | I am satisfied with my sex life .....                                                                                                                                                                       | 0          | 1            | 2         | 3           | 4         |

**EMOTIONAL WELL-BEING**

|     |                                                           | Not at all | A little bit | Some-what | Quite a bit | Very much |
|-----|-----------------------------------------------------------|------------|--------------|-----------|-------------|-----------|
| GE1 | I feel sad .....                                          | 0          | 1            | 2         | 3           | 4         |
| GE2 | I am satisfied with how I am coping with my illness ..... | 0          | 1            | 2         | 3           | 4         |
| GE3 | I am losing hope in the fight against my illness.....     | 0          | 1            | 2         | 3           | 4         |
| GE4 | I feel nervous.....                                       | 0          | 1            | 2         | 3           | 4         |
| GE5 | I worry about dying.....                                  | 0          | 1            | 2         | 3           | 4         |
| GE6 | I worry that my condition will get worse .....            | 0          | 1            | 2         | 3           | 4         |

**FUNCTIONAL WELL-BEING**

|     |                                                         | Not at all | A little bit | Some-what | Quite a bit | Very much |
|-----|---------------------------------------------------------|------------|--------------|-----------|-------------|-----------|
| GF1 | I am able to work (include work at home) .....          | 0          | 1            | 2         | 3           | 4         |
| GF2 | My work (include work at home) is fulfilling.....       | 0          | 1            | 2         | 3           | 4         |
| GF3 | I am able to enjoy life .....                           | 0          | 1            | 2         | 3           | 4         |
| GF4 | I have accepted my illness .....                        | 0          | 1            | 2         | 3           | 4         |
| GF5 | I am sleeping well.....                                 | 0          | 1            | 2         | 3           | 4         |
| GF6 | I am enjoying the things I usually do for fun.....      | 0          | 1            | 2         | 3           | 4         |
| GF7 | I am content with the quality of my life right now..... | 0          | 1            | 2         | 3           | 4         |

Please circle or mark one number per line to indicate your response as it applies to the past 7 days.

| <b><u>ADDITIONAL CONCERNS</u></b> |                                                                                                  | <b>Not<br/>at all</b> | <b>A little<br/>bit</b> | <b>Some-<br/>what</b> | <b>Quite<br/>a bit</b> | <b>Very<br/>much</b> |
|-----------------------------------|--------------------------------------------------------------------------------------------------|-----------------------|-------------------------|-----------------------|------------------------|----------------------|
| BL1                               | I have trouble controlling my urine.....                                                         | 0                     | 1                       | 2                     | 3                      | 4                    |
| C2                                | I am losing weight .....                                                                         | 0                     | 1                       | 2                     | 3                      | 4                    |
| C3                                | I have control of my bowels.....                                                                 | 0                     | 1                       | 2                     | 3                      | 4                    |
| BL2                               | I urinate more frequently than usual .....                                                       | 0                     | 1                       | 2                     | 3                      | 4                    |
| C5                                | I have diarrhoea .....                                                                           | 0                     | 1                       | 2                     | 3                      | 4                    |
| C6                                | I have a good appetite.....                                                                      | 0                     | 1                       | 2                     | 3                      | 4                    |
| C7                                | I like the appearance of my body.....                                                            | 0                     | 1                       | 2                     | 3                      | 4                    |
| BL3                               | It burns when I urinate.....                                                                     | 0                     | 1                       | 2                     | 3                      | 4                    |
| BL4                               | I am interested in sex.....                                                                      | 0                     | 1                       | 2                     | 3                      | 4                    |
| BL5                               | (For men only) I am able to have and maintain an<br>erection .....                               | 0                     | 1                       | 2                     | 3                      | 4                    |
| Q2                                | Do you have an ostomy appliance?<br>No___ Yes___ If yes, answer the following two<br>items:<br>↓ |                       |                         |                       |                        |                      |
| C8                                | I am embarrassed by my ostomy appliance .....                                                    | 0                     | 1                       | 2                     | 3                      | 4                    |
| C9                                | Caring for my ostomy appliance is difficult.....                                                 | 0                     | 1                       | 2                     | 3                      | 4                    |

**Section 6 – Fatigue (FACIT - Fatigue)**

Below is a list of statements that other people have said are important. **Please circle or mark one number per line to indicate your response as it applies to the past 7 days.**

|      |                                                                       | Not at all | A little bit | Some-what | Quite a bit | Very much |
|------|-----------------------------------------------------------------------|------------|--------------|-----------|-------------|-----------|
| HI7  | I feel fatigued.....                                                  | 0          | 1            | 2         | 3           | 4         |
| HI12 | I feel weak all over.....                                             | 0          | 1            | 2         | 3           | 4         |
| An1  | I feel listless (“washed out”).....                                   | 0          | 1            | 2         | 3           | 4         |
| An2  | I feel tired .....                                                    | 0          | 1            | 2         | 3           | 4         |
| An3  | I have trouble <u>starting</u> things because I am tired.....         | 0          | 1            | 2         | 3           | 4         |
| An4  | I have trouble <u>finishing</u> things because I am tired .....       | 0          | 1            | 2         | 3           | 4         |
| An5  | I have energy.....                                                    | 0          | 1            | 2         | 3           | 4         |
| An7  | I am able to do my usual activities .....                             | 0          | 1            | 2         | 3           | 4         |
| An8  | I need to sleep during the day .....                                  | 0          | 1            | 2         | 3           | 4         |
| An12 | I am too tired to eat.....                                            | 0          | 1            | 2         | 3           | 4         |
| An14 | I need help doing my usual activities .....                           | 0          | 1            | 2         | 3           | 4         |
| An15 | I am frustrated by being too tired to do the things I want to do..... | 0          | 1            | 2         | 3           | 4         |
| An16 | I have to limit my social activity because I am tired.....            | 0          | 1            | 2         | 3           | 4         |

Peer review only

Over the past 2 weeks, how often have you been bothered by any of the following problems?

Not At all      Several Days      More Than Half the Days      Nearly Every Day

|                                                                                                                                                                              |   |   |   |   |
|------------------------------------------------------------------------------------------------------------------------------------------------------------------------------|---|---|---|---|
| 1. Little interest or pleasure in doing things                                                                                                                               | 0 | 1 | 2 | 3 |
| 2. Feeling down, depressed or hopeless                                                                                                                                       | 0 | 1 | 2 | 3 |
| 3. Trouble falling asleep, staying asleep, or sleeping too much                                                                                                              | 0 | 1 | 2 | 3 |
| 4. Feeling tired or having little energy                                                                                                                                     | 0 | 1 | 2 | 3 |
| 5. Poor appetite or overeating                                                                                                                                               | 0 | 1 | 2 | 3 |
| 6. Feeling bad about yourself - or that you're a failure or have let yourself or your family down                                                                            | 0 | 1 | 2 | 3 |
| 7. Trouble concentrating on things, such as reading the newspaper or watching television                                                                                     | 0 | 1 | 2 | 3 |
| 8. Moving or speaking so slowly that other people could have noticed. Or, the opposite - being so fidgety or restless that you have been moving around a lot more than usual | 0 | 1 | 2 | 3 |
| 9. Thoughts that you would be better off dead or of hurting yourself in some way                                                                                             | 0 | 1 | 2 | 3 |

Column Totals      \_\_\_\_\_ + \_\_\_\_\_ + \_\_\_\_\_

Add Totals Together      \_\_\_\_\_

10. If you checked off any problems, how difficult have those problems made it for you to Do your work, take care of things at home, or get along with other people?

Not difficult at all     Somewhat difficult     Very difficult     Extremely difficult



Under each heading, please tick the ONE box that best describes your health TODAY.

**MOBILITY**

- I have no problems in walking about
- I have slight problems in walking about
- I have moderate problems in walking about
- I have severe problems in walking about
- I am unable to walk about

**SELF-CARE**

- I have no problems washing or dressing myself
- I have slight problems washing or dressing myself
- I have moderate problems washing or dressing myself
- I have severe problems washing or dressing myself
- I am unable to wash or dress myself

**USUAL ACTIVITIES** (*e.g. work, study, housework, family or leisure activities*)

- I have no problems doing my usual activities
- I have slight problems doing my usual activities
- I have moderate problems doing my usual activities
- I have severe problems doing my usual activities
- I am unable to do my usual activities

**PAIN / DISCOMFORT**

- I have no pain or discomfort
- I have slight pain or discomfort
- I have moderate pain or discomfort
- I have severe pain or discomfort
- I have extreme pain or discomfort

**ANXIETY / DEPRESSION**

- I am not anxious or depressed
- I am slightly anxious or depressed
- I am moderately anxious or depressed
- I am severely anxious or depressed
- I am extremely anxious or depressed

The best health  
you can imagine

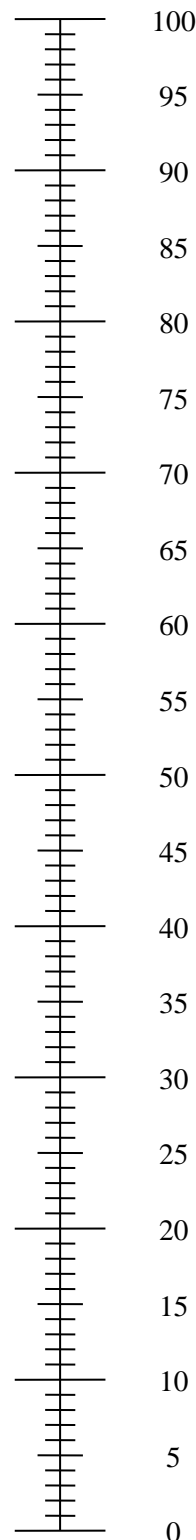

The worst health  
you can imagine

- We would like to know how good or bad your health is TODAY.
- This scale is numbered from 0 to 100.
- 100 means the best health you can imagine.  
0 means the worst health you can imagine.
- Mark an X on the scale to indicate how your health is TODAY.
- Now, please write the number you marked on the scale in the box below.

YOUR HEALTH TODAY =

**Section 9 – Physical activity**

Think about an average week in the past months. Please indicate **how many days per week** you performed the following activities, how much time on average you were engaged in this, and (if applicable) how strenuous this activity was for you?

|                                                                | Days per week | Average time per day | Effort (circle please) |
|----------------------------------------------------------------|---------------|----------------------|------------------------|
| <b>Walking</b>                                                 | days          | hours minutes        | slow/moderate/fast     |
| <b>Bicycling</b>                                               | days          | hours minutes        | slow/moderate/fast     |
| <b>Other physical activity (e.g. swimming, gym, gardening)</b> | days          | hours minutes        | slow/moderate/fast     |

If you wear a pedometer on a regular basis, on average how many steps a day do you take?

&lt;2500 steps

2500-4999 steps

5000-9999 steps

10000 or more steps

N/A – do not use

**Section 10 – Diet (Hertfordshire Short Questionnaire)**

The section below asks you about how often over the past 3 months you have eaten particular foods.

| FOOD AND AMOUNTS                                                                  |                                                                   | AVERAGE USE IN PAST 3 MONTHS |                      |               |             |             |          |            |             |            |            |
|-----------------------------------------------------------------------------------|-------------------------------------------------------------------|------------------------------|----------------------|---------------|-------------|-------------|----------|------------|-------------|------------|------------|
|                                                                                   |                                                                   | Never                        | Less than once/month | 1-3 per month | Once a week | 2-4 pe week | 5-6 week | Once a day | 2-3 per day | 4-5 pe day | 6+ per day |
| 1                                                                                 | White bread (one slice)                                           |                              |                      |               |             |             |          |            |             |            |            |
| 2                                                                                 | Brown and wholemeal bread (one slice)                             |                              |                      |               |             |             |          |            |             |            |            |
| 3                                                                                 | Biscuits eg digestive (one)                                       |                              |                      |               |             |             |          |            |             |            |            |
| 4                                                                                 | Apples (one fruit)                                                |                              |                      |               |             |             |          |            |             |            |            |
| 5                                                                                 | Bananas (one fruit)                                               |                              |                      |               |             |             |          |            |             |            |            |
| 6                                                                                 | Melon, pineapple, kiwi and other tropical fruits (medium serving) |                              |                      |               |             |             |          |            |             |            |            |
| 7                                                                                 | Green salad eg lettuce, cucumber, celery                          |                              |                      |               |             |             |          |            |             |            |            |
| 8                                                                                 | Garlic – raw and cooked dishes                                    |                              |                      |               |             |             |          |            |             |            |            |
| 9                                                                                 | Marrow and courgettes                                             |                              |                      |               |             |             |          |            |             |            |            |
| 10                                                                                | Pepper – cooked and fresh                                         |                              |                      |               |             |             |          |            |             |            |            |
| 11                                                                                | Yogurt (125g pot)                                                 |                              |                      |               |             |             |          |            |             |            |            |
| 12                                                                                | Egg as boiled, fried, scrambled, etc (one egg)                    |                              |                      |               |             |             |          |            |             |            |            |
| 13                                                                                | White fish eg cod, haddock, plaice, sole (not in batter/crumbs)   |                              |                      |               |             |             |          |            |             |            |            |
| 14                                                                                | Oily fish, eg mackerel, tuna, salmon                              |                              |                      |               |             |             |          |            |             |            |            |
| 15                                                                                | Bacon and gammon                                                  |                              |                      |               |             |             |          |            |             |            |            |
| 16                                                                                | Meat pies, eg pork pie, pasties, steak & kidney, sausage rolls    |                              |                      |               |             |             |          |            |             |            |            |
| 17                                                                                | Boiled, mashed and jacket potatoes (one egg size potato)          |                              |                      |               |             |             |          |            |             |            |            |
| 18                                                                                | Chips                                                             |                              |                      |               |             |             |          |            |             |            |            |
| 19                                                                                | Pasta eg spaghetti, macaroni                                      |                              |                      |               |             |             |          |            |             |            |            |
| Which is the main spreading fat you have used for example on bread or vegetables? |                                                                   |                              |                      |               |             |             |          |            |             |            |            |
| 20                                                                                | Spreading fat (teaspoon)                                          |                              |                      |               |             |             |          |            |             |            |            |
|                                                                                   | _____                                                             |                              |                      |               |             |             |          |            |             |            |            |

**ADDITIONAL DIETARY QUESTIONS**

**Q21** Which types of milk have you used regularly in drinks and added to breakfast cereals over the past three months? Circle all that apply.

1. Whole pasteurised
2. Semi-skimmed pasteurised (include 1% milks)
3. Skimmed pasteurised
4. Whole UHT
5. Semi-skimmed UHT
6. Skimmed UHT
7. Other: \_\_\_\_\_ (please specify)
8. None (go to Q23)

Of the above, which are the three types of milk that you drink most commonly?

Number \_\_\_\_ (Milk A)

Number \_\_\_\_ (Milk B)

Number \_\_\_\_ (Milk C)

**Q22** On average over the past three months how much of the above have you consumed per day?

Milk A                    \_\_\_\_ . \_\_\_\_\_ pints

Milk B                    \_\_\_\_ . \_\_\_\_\_ pints

Milk C                    \_\_\_\_ . \_\_\_\_\_ pints

**Q23** Have you added sugar to tea and coffee or breakfast cereals in the past three months?

No

Yes (go to Q24)

**Q24** Approximately how many teaspoons of sugar have you added each day? \_\_\_\_\_

# BMJ Open

## The Graham Roberts Study Protocol: a first "Trials within Cohort study" for bladder cancer

|                                 |                                                                                                                                                                                                                                                                                                                                                                                                                                                                                                                                                                                                                                                                                                                                                                                                                                                                                                                                                                                                                                                                                                                                                                                                                                                                                                                                                                                                                                                                                                                                                                                                                                                                                                                                                                                                     |
|---------------------------------|-----------------------------------------------------------------------------------------------------------------------------------------------------------------------------------------------------------------------------------------------------------------------------------------------------------------------------------------------------------------------------------------------------------------------------------------------------------------------------------------------------------------------------------------------------------------------------------------------------------------------------------------------------------------------------------------------------------------------------------------------------------------------------------------------------------------------------------------------------------------------------------------------------------------------------------------------------------------------------------------------------------------------------------------------------------------------------------------------------------------------------------------------------------------------------------------------------------------------------------------------------------------------------------------------------------------------------------------------------------------------------------------------------------------------------------------------------------------------------------------------------------------------------------------------------------------------------------------------------------------------------------------------------------------------------------------------------------------------------------------------------------------------------------------------------|
| Journal:                        | <i>BMJ Open</i>                                                                                                                                                                                                                                                                                                                                                                                                                                                                                                                                                                                                                                                                                                                                                                                                                                                                                                                                                                                                                                                                                                                                                                                                                                                                                                                                                                                                                                                                                                                                                                                                                                                                                                                                                                                     |
| Manuscript ID                   | bmjopen-2019-029468.R2                                                                                                                                                                                                                                                                                                                                                                                                                                                                                                                                                                                                                                                                                                                                                                                                                                                                                                                                                                                                                                                                                                                                                                                                                                                                                                                                                                                                                                                                                                                                                                                                                                                                                                                                                                              |
| Article Type:                   | Protocol                                                                                                                                                                                                                                                                                                                                                                                                                                                                                                                                                                                                                                                                                                                                                                                                                                                                                                                                                                                                                                                                                                                                                                                                                                                                                                                                                                                                                                                                                                                                                                                                                                                                                                                                                                                            |
| Date Submitted by the Author:   | 14-Jun-2019                                                                                                                                                                                                                                                                                                                                                                                                                                                                                                                                                                                                                                                                                                                                                                                                                                                                                                                                                                                                                                                                                                                                                                                                                                                                                                                                                                                                                                                                                                                                                                                                                                                                                                                                                                                         |
| Complete List of Authors:       | <p>Wylie, Harriet; King's College London, Translational Oncology and Urology Research<br/> Cahill, Fidelma; King's College London, Translational Oncology and Urology Research<br/> Santaolalla, Aida ; King's College London, Translational Oncology and Urology Research<br/> Moss, Charlotte; King's College London, Translational Oncology and Urology Research<br/> Enting, Deborah; King's College London, Translational Oncology and Urology Research; Guy's and Saint Thomas' NHS Foundation Trust, Department of Medical Oncology<br/> Amery , Suzanne; Guy's and Saint Thomas' NHS Foundation Trust, Urology Centre<br/> Chatterton, Kathryn; Guy's and Saint Thomas' NHS Foundation Trust, Urology Centre<br/> Khan, Muhammad; Guy's &amp; St Thomas' Hospital, Urology<br/> Bryan, Richard; University of Birmingham<br/> Gillett, Cheryl; King's College London, King's Health Partners Cancer Biobank<br/> Josephs, Debra; King's College London, Translational Oncology and Urology Research; Guy's and Saint Thomas' NHS Foundation Trust, Department of Medical Oncology<br/> Chowdhury, Simon; King's College London, Translational Oncology and Urology Research; Guy's and Saint Thomas' NHS Foundation Trust, Department of Medical Oncology<br/> Rudman, Sarah; King's College London, Translational Oncology and Urology Research; Guy's and Saint Thomas' NHS Foundation Trust, Department of Medical Oncology<br/> Hughes, Simon; King's College London, Translational Oncology and Urology Research; Guy's and Saint Thomas' NHS Foundation Trust, Department of Medical Oncology<br/> Relton, Clare; University of Sheffield, SchARR; Queen Mary University of London<br/> Van Hemelrijck, Mieke; King's College London, Translational Oncology and Urology Research</p> |
| <b>Primary Subject Heading</b>: | Oncology                                                                                                                                                                                                                                                                                                                                                                                                                                                                                                                                                                                                                                                                                                                                                                                                                                                                                                                                                                                                                                                                                                                                                                                                                                                                                                                                                                                                                                                                                                                                                                                                                                                                                                                                                                                            |
| Secondary Subject Heading:      | Epidemiology, Oncology, Urology, Research methods                                                                                                                                                                                                                                                                                                                                                                                                                                                                                                                                                                                                                                                                                                                                                                                                                                                                                                                                                                                                                                                                                                                                                                                                                                                                                                                                                                                                                                                                                                                                                                                                                                                                                                                                                   |

1  
2  
3  
4  
5  
6  
7  
8  
9  
10  
11  
12  
13  
14  
15  
16  
17  
18  
19  
20  
21  
22  
23  
24  
25  
26  
27  
28  
29  
30  
31  
32  
33  
34  
35  
36  
37  
38  
39  
40  
41  
42  
43  
44  
45  
46  
47  
48  
49  
50  
51  
52  
53  
54  
55  
56  
57  
58  
59  
60

|           |                                                                                           |
|-----------|-------------------------------------------------------------------------------------------|
| Keywords: | trials within cohorts, bladder cancer, randomised control trial, prospective cohort study |
|           |                                                                                           |

SCHOLARONE™  
Manuscripts

## The Graham Roberts Study Protocol: a first “Trials within Cohort study” for bladder cancer

Wylie H<sup>1</sup>, Cahill F<sup>1</sup>, Santaolalla A<sup>1</sup>, \*Moss CL<sup>1</sup>, Enting D<sup>1,2</sup>, Amery S<sup>3</sup>, Chatterton K<sup>3</sup>, Khan SM<sup>3</sup>, Bryan RT<sup>4</sup>, Gillett C<sup>5</sup>, Josephs D<sup>1,2</sup>, Chowdhury S<sup>1,2</sup>, Rudman S<sup>1,2</sup>, Hughes S,<sup>1,2</sup> Relton C<sup>6,7</sup>, Van Hemelrijck M<sup>1</sup>.

### Affiliations:

1. King’s College London, School of Cancer and Pharmaceutical Sciences, Translational Oncology & Urology Research (TOUR), London, UK
2. Guy’s and St Thomas’ NHS Foundation Trust, Department of Medical Oncology, London, UK
3. Guy’s and St Thomas’ NHS Foundation Trust, Urology Centre, London, UK
4. University of Birmingham, Institute of Cancer & Genomic Sciences, Birmingham, UK
5. King’s College London, King’s Health Partners Cancer Biobank, London, UK
6. University of Sheffield, ScHARR, Sheffield, UK
7. Queen Mary University, London, UK

### \*Corresponding author:

Miss Charlotte Moss  
Translational Oncology & Urology Research (TOUR)  
Guy’s Hospital, 3<sup>rd</sup> Floor Bermondsey Wing, London SE1 9RT, UK  
[charlotte.moss@kcl.ac.uk](mailto:charlotte.moss@kcl.ac.uk)  
020 718 52985

**Email addresses:** [harriet.wylie@kcl.ac.uk](mailto:harriet.wylie@kcl.ac.uk); [fidelma.cahill@kcl.ac.uk](mailto:fidelma.cahill@kcl.ac.uk); [aida.santaolalla@kcl.ac.uk](mailto:aida.santaolalla@kcl.ac.uk); [charlotte.moss@kcl.ac.uk](mailto:charlotte.moss@kcl.ac.uk); [Deborah.enting@kcl.ac.uk](mailto:Deborah.enting@kcl.ac.uk); [Suzanne.amery@gstt.nhs.uk](mailto:Suzanne.amery@gstt.nhs.uk); [Kathryn.chatterton@gstt.nhs.uk](mailto:Kathryn.chatterton@gstt.nhs.uk); [shamim.khan@gstt.nhs.uk](mailto:shamim.khan@gstt.nhs.uk); [R.T.Bryan@bham.ac.uk](mailto:R.T.Bryan@bham.ac.uk); [Cheryl.gillett@kcl.ac.uk](mailto:Cheryl.gillett@kcl.ac.uk); [debra.josephs@kcl.ac.uk](mailto:debra.josephs@kcl.ac.uk); [simon.chowdhury@gstt.nhs.uk](mailto:simon.chowdhury@gstt.nhs.uk); [sarah.rudman@gstt.nhs.uk](mailto:sarah.rudman@gstt.nhs.uk); [simon.1.hughes@kcl.ac.uk](mailto:simon.1.hughes@kcl.ac.uk); [c.relton@sheffield.ac.uk](mailto:c.relton@sheffield.ac.uk); [mieke.vanhemelrijck@kcl.ac.uk](mailto:mieke.vanhemelrijck@kcl.ac.uk)



1  
2  
3 **32 Abstract**  
4

5 **33 Introduction:** Given the need for more bladder cancer research and the recently observed  
6  
7 **34** advantages of introducing the trials within cohort (TwICs) design, the set-up of the Graham Roberts  
8  
9 **35** Study (Roberts Study) will provide valuable infrastructure to answer a wide variety of research  
10  
11  
12 **36** questions of a clinical, mechanistic, as well as supportive care nature in the area of bladder cancer.  
13

14 **37 Methods:** Using the TwICs design, we will recruit patients aged 18 or older who are willing and able  
15  
16  
17 **38** to provide signed informed consent and have a diagnosis of new or recurrent bladder cancer into  
18  
19 **39** this prospective cohort study. All patients must have a basic understanding of the English language.  
20

21 **40** The following questionnaires will be collected at baseline and every 12 months subsequently:  
22

23 **41** Functional assessment of chronic illness therapy for bladder cancer (FACT-BI), the Functional  
24  
25 **42** assessment of chronic illness therapy-fatigue (FACIT-Fatigue), the Patient Health questionnaire-9  
26  
27 **43** (PHQ-9), the Standardised instrument for a generic health status (EQ-5D-5L), a questionnaire to  
28  
29 **44** assess health enhancing physical activity (SQUASH), and the Hertfordshire short questionnaire to  
30  
31 **45** assess diet quality.  
32  
33

34 **46 Ethics and Dissemination:** Due to the nature of this study, we obtained full ethical clearance from  
35  
36  
37 **47** the London - Fulham Research Ethics Committee (17/LO1975). All participants must provide full  
38  
39 **48** informed consent before recruitment onto the study. The results of this study will be published in  
40  
41 **49** peer-reviewed journals and data collected as part of the study will be made available to potential  
42  
43 **50** collaborators on an application basis.  
44  
45

46 **51**

47  
48 **52 Keywords:** trials within cohorts, bladder cancer, randomised controlled trial, prospective cohort  
49  
50 **53** study  
51

52 **54**

53 **55**

54 **56**

55 **57**  
56  
57  
58  
59  
60

## 58 **Strengths and Limitations**

- 59 1. First trials within cohort (TwICs) study design for bladder cancer.
- 60 2. TwICs design generates a wide variety of research opportunities with limited risk to patients.
- 61 3. The non-interventional nature of this study means patient participation may not benefit  
62 patients' bladder cancer prognosis or quality of life.

## 64 **Background**

65 Bladder cancer is the 7<sup>th</sup> most common cancer in the UK, with c.10,400 patients diagnosed annually  
66 (1); c. 50% of patients will survive their cancer for 10 years or more after diagnosis. For the majority  
67 of patients, the disease remains indolent following initial treatment, and invasive and burdensome  
68 surveillance is required to mitigate the high risk of recurrence (2). However, there is proportionally  
69 less research into bladder cancer compared to breast, prostate or kidney cancer (3). To provide the  
70 most efficient and high impact research strategy for bladder cancer patients in the UK, we have  
71 established a prospective cohort study of newly diagnosed bladder cancer patients to allow research  
72 that can efficiently address clinical, mechanistic, as well as supportive care related questions.

73  
74 The design of this bladder cancer cohort study is similar to the Utrecht cohort for Multiple BREast  
75 cancer intervention studies and Long-term evaluation (UMBRELLA) (4), which is based on the TwICs  
76 design introduced by Relton et al. at the University of Sheffield in 2010 (5). It is the first TwICs design  
77 study in the area of bladder cancer.

78  
79 The use of TwICs has grown substantially in the last few years, with several new initiatives in the UK.  
80 TwICs, originally introduced as cohort multiple randomised controlled trial design, was introduced to  
81 address the problems associated with existing approaches for trials informing routine clinical  
82 practice(5). Such shortcomings relate to recruitment, ethics, patient preferences and treatment  
83 comparisons. At least six TwICs studies are currently ongoing in the UK (6).

1  
2  
3 84  
45 85 The Roberts Study will serve as a facility for multiple trials and follows the TwiCs design.  
6  
78 86  
910 87 The main objectives of the Graham Roberts study (Roberts Study) are:  
1112 88 • To create a prospective cohort study of well-characterised bladder cancer patients, which  
13 provides the opportunity to conduct a variety of observational studies.  
14 8915 90 • To create the infrastructure for future RCTs that will allow more efficient recruitment using  
16 patient-centred informed consent  
17 91  
18  
19  
20  
21  
2223 93 **Methods/Design**24 94 *TwiCs design*25  
26 95 The TwiCs design can be described as follows: Firstly, a large observational cohort of patients with  
27  
28 96 the condition of interest is recruited and their outcomes regularly measured. Then for each  
29  
30 97 randomised controlled trial (RCT), information from the cohort is used to identify all eligible  
31  
32 98 patients. Some eligible patients are randomly selected and offered the trial intervention. The  
33  
34 99 outcomes of these randomly selected patients are then compared with the outcomes of eligible  
35  
36 100 patients not randomly selected, that is, those receiving usual care. This process can be repeated for  
37  
38 101 further randomised controlled trials (5).  
39  
40  
41  
42  
43  
44  
4546 103 The recruitment and regular follow-up of a large cohort of patients are characteristics of longitudinal  
47  
48 104 observational studies. In the TwiCs design, however, all patients in the cohort consent at the outset  
49  
50 105 to provide data to be used to look at the benefits of treatments for the condition of interest. The  
51  
52 106 capacity for multiple RCTs over time using patients from the same cohort is unique to the TwiCs  
53  
54 107 design. Random selection of some eligible cohort patients, the comparison of their outcomes with  
55  
56 108 the outcomes in eligible patients not randomly selected and the similarity of the patient-centred  
57  
58  
59  
60

1  
2  
3 109 informed consent approach to real life situations offer solutions to the ethical criticisms of  
4  
5 110 randomised consent designs (5).

6  
7 111

8  
9  
10 112 *The Graham Roberts Study*

11  
12 113 Patients will be recruited at Guy's and St Thomas' (GSTT) NHS Foundation Trust, London, UK. All

13  
14 114 patients will be eligible for the study following their first visit for a new or recurrent bladder cancer

15  
16 115 diagnosis. Patients with limited understanding of the English language and patients under the age of

17  
18 116 18 years are ineligible. Since Guy's and St Thomas NHS Foundation Trust is a referral centre, the

19  
20 117 Roberts Study will include patients from various secondary and tertiary hospitals located across the

21  
22 118 United Kingdom. Each year, approximately 100 eligible patients visit the Urology Centre of GSTT for

23  
24 119 bladder cancer management.

25  
26  
27  
28 120

29  
30 121 All eligible patients who have already undergone diagnostic investigations and been informed about

31  
32 122 a (highly likely) bladder cancer will receive detailed written information about the Roberts Study

33  
34 123 whilst attending the Urology Centre for their initial appointment. They will be scheduled to see a

35  
36 124 member of the direct clinical care team and a research nurse/assistant 30 minutes prior to their first

37  
38 125 appointment with the Consultant (urology or oncology). During this research consultation, the

39  
40 126 research nurse/assistant will explain the study in detail and written informed consent will be

41  
42 127 obtained from those who agree to participate. Such consent will be gained to allow:

43  
44  
45 128 • Participation in the Graham Roberts Study cohort and longitudinal study;

46  
47 129 • The participant to be approached to participate in the intervention arm of any future

48  
49 130 randomised control trial;

50  
51 131 • The participant to be randomised to the control arm of any future randomised control trial

52  
53 132 without knowledge of this status.

54  
55 133 • Collection and storage of participants biological samples, including blood, urine and tissue,

56  
57 134 within the KHP Bladder Cancer Biobank;

58  
59  
60

- 1  
2  
3 135       • Linkage and use of participants routinely collected clinical data as recorded in electronic  
4  
5 136           patient records.  
6  
7  
8 137

9  
10 138   At the time of full informed consent, the patients will also be provided with the study baseline  
11  
12 139   questionnaire and asked to complete this at a convenient time.  
13

14 140

15  
16 141   For those eligible patients who have not yet been informed about their bladder cancer diagnosis at  
17  
18 142   the time of visiting the Urology Centre, detailed written information about the Roberts Study will be  
19  
20 143   provided by a research nurse/assistant after they have met with the consultant. If the patients are  
21  
22 144   not ready to discuss this study in further detail at this point, a follow-up call will be made one week  
23  
24 145   later to obtain their consent, if they have agreed to participate. Full written informed consent is  
25  
26 146   subsequently obtained at the patients next clinical appointment.  
27

28 147

29  
30 148   Data from all patients may be used for observational studies in the Roberts Study, but only those  
31  
32 149   who provide consent for randomisation are eligible for participation in the RCTs within the Roberts  
33  
34 150   Study.  
35

36 151

37  
38  
39 152   Thus, the TwiCs design is based on an “asymmetric informed consent”. After recruitment into the  
40  
41 153   Roberts cohort, randomisation of eligible subjects, can be followed by an asymmetric treatment of  
42  
43 154   the two arms; those selected for the experimental arm provide informed consent for the  
44  
45 155   intervention trial, while the data from the control arm are used based on prior broad permission.  
46  
47 156   Hence, the cohort participants are informed about future research within the cohort.  
48  
49 157

50 158

51 159

#### 52 158 *Selection and withdrawal of subjects*

53  
54  
55 159   Patients eligible to participate in this study are those who meet all of the following inclusion criteria:  
56  
57  
58  
59  
60

1  
2  
3 160 • Appointment for a new or recurrent diagnosis of bladder cancer at Guy's and St Thomas' NHS  
4  
5 161 Foundation Trust

6  
7  
8 162 • Minimum age of 18 years

9  
10 163 • Basic understanding of English

11  
12 164

13  
14 165 Patients will be identified in multi-disciplinary team meetings or in out-patient clinics by the clinical  
15  
16 166 team, in collaboration with the research nurse. Participants have the right to withdraw from the  
17  
18 167 study at any time for any reason. Their routine medical and surgical care will not be affected.  
19  
20

21 168

22  
23 169 *Expected duration of the study and sample size*

24  
25 170 As this study is an observational prospective cohort study, it is difficult to estimate its duration. We  
26  
27 171 aim to recruit a minimum of 400 patients over a period of 5 years, though there is no limit to the  
28  
29 172 number of patients needed for a prospective cohort study. Moreover, over time new research  
30  
31 173 opportunities will develop and potential funding may become available to continue recruitment into  
32  
33 174 the Roberts Study. Patients will be followed up for life through data linkages with Hospital Episode  
34  
35 175 Statistics (HES), the Office for National Statistics (ONS) and electronic patient records.  
36  
37

38  
39 176 As this is a prospective cohort study, with no specific primary research question, it is not possible to  
40  
41 177 perform sample size calculations. However, it is still important to consider recruitment rates and  
42  
43 178 response rates to the questionnaires.  
44  
45

46 179

47  
48 180 Recruitment to the Graham Roberts Study commenced on 23<sup>rd</sup> March 2018. At the point of  
49  
50 181 submission of this protocol (April 2019), 84 bladder cancer patients had been approached with a  
51  
52 182 patient information sheet, and 72 patients had provided full written informed consent and  
53  
54 183 completed the baseline study questionnaire. At current rates of consent, the authors project the  
55  
56 184 baseline recruitment of 400 bladder cancer patients to be complete by 31<sup>st</sup> August 2023. It is  
57  
58 185 expected, however, that recruitment rates will increase as the direct clinical care team and research  
59  
60

1  
2  
3 186 nurses/assistants become more efficient at identifying and approaching eligible patients. The  
4  
5 187 projected end of recruitment date is therefore set at 31<sup>st</sup> December 2022. Moreover, ethical  
6  
7 188 clearance is in place to recruit until this date.  
8  
9

10 189

11  
12 190 *Data collection*

13  
14 191 Within the Roberts Study, various clinical data will be prospectively collected including  
15  
16 192 demographics, tumour characteristics, treatment and CT and MRI imaging data. Clinical data will be  
17  
18 193 captured from electronic medical records, referral letters and annual reports for Public Health  
19  
20 194 England.  
21  
22

23 195

24  
25 196 Socio-demographic data will include sex, date of birth, age at diagnosis, highest level of education,  
26  
27 197 postal code (to estimate the deprivation index), body mass index (BMI) and WHO performance  
28  
29 198 status.  
30  
31

32 199

33  
34 200 The following tumour characteristics will be collected: TNM stage, grade, tumour diameter, number  
35  
36 201 of tumours, histology and morphological codes and invasiveness.  
37  
38

39 202

40  
41 203 Treatment characteristics comprise data on type and timing of treatment given (e.g. intravesical  
42  
43 204 instillations, systemic chemotherapy, radical cystectomy, radiotherapy or other treatments).  
44

45 205 Additional detailed data, as reported in surgical notes, will be available for those bladder cancer  
46  
47 206 patients who undergo radical cystectomy. Table 1 illustrates the pre-, peri- and postoperative  
48  
49 207 variables which will be collected for this patient subset.  
50  
51

52 208

53  
54 209

55  
56  
57 210

58 211  
59  
60

212 **Table 1:** Data collection for those participants of the Roberts Study undergoing radical  
 213 cystectomy

|                   |                                                                                                                                                                                                  |
|-------------------|--------------------------------------------------------------------------------------------------------------------------------------------------------------------------------------------------|
| 214 .Preoperative | TNM stage, weight, height, BMI, American Society of Anesthesiologists (ASA) score, previous pelvic surgery, radiation or neoadjuvant chemotherapy                                                |
| 215 Perioperative | Type of surgery, type of lymphadenectomy, type of urinary diversion, blood loss, duration of surgery, accidental organ injury during surgery                                                     |
| 216 Postoperative | Complications (Clavien-Dindo), re-operations and re-admissions within 90 days, length of hospital stay, pT stage, number of excised lymph nodes and number of excised and metastatic lymph nodes |

217

218 Information on disease progression, recurrence and survival will be collected annually by means of  
 219 the data linkages with HES, ONS and electronic patient records. We will also collect patient-reported  
 220 outcome measures (PROMs) by means of validated questionnaires designed to quantify health-  
 221 related Quality of Life (QoL) from the patients' perspective. These questionnaires will be given  
 222 (paper (post) or digital (email or tablet in clinic)) to patients upon entry into the cohort (baseline)  
 223 and every 12 months thereafter with a total follow-up of at least 10 years. It will take about 30  
 224 minutes to fill out the set of questionnaires at each time point.

225

226 PROMs will be collected on QoL, fatigue, anxiety and depression, physical activity, dietary habits as  
 227 well as risk behaviour in terms of known bladder cancer risk factors. Following an assessment of  
 228 smoking behaviour, alcohol consumption and occupational bladder cancer risk factors, the following  
 229 validated questionnaires will be used (see Additional File 1):

230

- 231 • **Quality of Life:** Functional assessment of chronic illness therapy for bladder cancer (FACT-BI  
 232 (7))
- 233 • **Fatigue:** Functional assessment of chronic illness therapy-fatigue (FACIT-Fatigue (8))
- 234 • **Depression:** Patient health questionnaire-9 (PHQ-9 (9))
- 235 • **Health :** Standardised instrument for use as a measure of health outcome (EQ-5D-5L(10))
- 236 • **Physical activity:** Questionnaire to assess health enhancing physical activity (SQUASH (11))



- 1  
2  
3 234 • **Assessment of dietary habits:** Short questionnaire to assess diet quality (12)  
4  
5  
6 235

7  
8 236 *Assessment of safety*  
9

10 237 As this is a prospective cohort study with no specific interventions, adverse events (AEs) are unlikely  
11  
12 238 to take place. Nevertheless, if filling out questionnaire data should ever result in an AE, it will be  
13  
14 239 graded according to the NCI Common Terminology Criteria for Adverse Events (CTCAE) Version 4.0  
15  
16 240 and coded. These will be reported to the Data Monitoring Committee.

17  
18 241 Given that we see on average about 100 eligible patients per year, we expect to recruit at least 400  
19  
20 242 patients over a period of five years. However, as described above, if more research and/or funding  
21  
22 243 opportunities come up, we will continue recruitment into the Roberts study.  
23  
24  
25 244

26  
27  
28 245 *Patient and Public Engagement*  
29

30 246 The development of the Graham Roberts Study was informed in collaboration with patient  
31  
32 247 representatives diagnosed and treated at Guy's and St Thomas' NHS Foundation Trust. Prior to  
33  
34 248 development of the study protocol, a focus group was held to discuss the acceptability of the TwiCs  
35  
36 249 study design and the content of the self-administered questionnaire. Patients of similar bladder  
37  
38 250 cancer diagnoses to those that will be consented onto the study were recruited into this focus  
39  
40 251 group. Based on the patient's experiences and preferences, the Graham Roberts Study design was  
41  
42 252 agreed. Results of the study will be disseminated to the patients through annual newsletters and on  
43  
44 253 a study specific website for patients.  
45  
46  
47 254

48  
49  
50 255 *Direct Access to Source Data and Documents*  
51

52 256 The Investigator will prepare and maintain adequate and accurate source documents designed to  
53  
54 257 record all observations and other pertinent data for each patient in the Roberts Study. Study  
55  
56 258 personnel will enter data from source documents corresponding to a patient's visit into the  
57  
58 259 protocol-specific electronic case report forms (CRFs) in a dedicated, secure data warehouse. Patients  
59  
60

1  
2  
3 260 will not be identified by name in the study database or on any study documents to be collected by  
4  
5 261 the Sponsor (or Designee), but will be identified by patient ID numbers.  
6  
7  
8 262

9  
10 263 The database will be safeguarded against unauthorised access with established security procedures;  
11  
12 264 nightly backup of the database and related software files will be maintained. At pre-specified  
13  
14 265 junctures of the protocol (e.g., production of interim and final reports), data for analysis will be  
15  
16 266 locked and cleaned as per established procedures.  
17  
18

19 267  
20  
21 268 If a correction is required to a CRF, the time and date stamps will track the person entering or  
22  
23 269 updating CRF data and create an electronic audit trail. The Chief Investigator is responsible for  
24  
25 270 reviewing all information collected on patients enrolled in this study for completeness and accuracy.  
26  
27

28 271  
29  
30 272 To enable evaluations and/or audits from regulatory authorities, the CI agrees to keep records,  
31  
32 273 including the identity of all participating subjects (sufficient information to link records, e.g. CRFs  
33  
34 274 and hospital records), all original signed informed consent forms, safety reporting forms, source  
35  
36 275 documents and detailed records of treatment disposition and adequate documentation of relevant  
37  
38 276 correspondence (e.g. letters, meeting minutes, telephone call reports). The records should be  
39  
40 277 retained by the CI according to the International Conference on Harmonisation (ICH) or local  
41  
42 278 regulations; all study documentation must be retained for 10 years after the study ends.  
43  
44  
45

46 279

#### 47 280 *Quality Assurance*

48  
49  
50 281 Monitoring of this study will be performed to ensure compliance with Good Clinical Practice, and  
51  
52 282 scientific integrity will be managed and oversight retained by the Data Monitoring Committee (DMC)  
53  
54 283 led by Prof Dominique Michaud. The committee will receive notification every 6 months of the  
55  
56 284 interim and total accrual. At the discretion of the chair of the DMC, interim analyses may be  
57  
58  
59  
60

1  
2  
3 285 scheduled as modifications to the protocol. Additional meetings during the study period may occur  
4  
5 286 at the discretion of the Steering Committee.  
6  
7  
8 287  
9

10 288 The study design, analysis and reporting will follow the recent recommendations for good practice in  
11  
12 289 clinical outcomes assessment by the International Society for Pharmacoeconomics and Outcomes  
13  
14 290 Research (ISPOR) (13).  
15  
16  
17 291

#### 18 292 *Data handling*

19  
20  
21 293 The Chief Investigator and delegates are responsible for daily cohort management. Data quality will  
22  
23 294 be checked periodically. The following guidelines will be strictly adhered to:

- 25 295 • Patient data will be anonymised.
- 26  
27  
28 296 • All anonymised data will be stored on a password protected encrypted computer.
- 29  
30 297 • All study data will be stored in line with the Data Protection Act as defined in the King's  
31  
32 298 Health Partners' Clinical Trials Office Archiving SOP.

33  
34 299 The data will be stored as outlined in the data management plan.  
35  
36  
37 300

#### 38 39 301 *Insurance/Indemnity*

40  
41 302 The co-sponsors King's College London and Guy's and St Thomas' NHS Foundation Trust will provide  
42  
43 303 insurance and indemnity.  
44  
45  
46 304

#### 47 48 305 **Discussion**

49  
50 306 The Graham Roberts study is the first of its kind and thus the first TwiCs study for bladder cancer. It  
51  
52 307 generates a wide variety of research opportunities with limited risk to patients. Participation in  
53  
54 308 research involves some loss of privacy. We will do our best to make sure that all personal  
55  
56  
57 309 information gathered for this study is kept private. As this is a non-interventional prospective cohort  
58  
59  
60

1  
2  
3 310 study, participation may not have a beneficial effect on patients' bladder cancer prognosis or  
4  
5 311 quality-of-life compared to usual care.  
6  
7 312  
8  
9 313 The questionnaires to be used are quite detailed and, for the most part, concerns day-to-day  
10  
11 314 activities such as quality and duration of sleep, diet and exercise. The questionnaire does pose some  
12  
13 315 more personal and intrusive questions however, including questions related to symptoms of  
14  
15 316 depression. These questions can be omitted if the participant does not feel comfortable answering  
16  
17 317 them. There is a risk that some participants may be upset by having these questions posed to them.  
18  
19 318 Some participants may prefer to complete the questionnaire themselves, whereas others may prefer  
20  
21 319 to do so with a research assistant. Participants will be fully informed about these potential harms  
22  
23 320 and enabled to make an informed decision regarding participation. We consider that the potential  
24  
25 321 minor harms are outweighed by the potential benefits of the research.  
26  
27 322  
28  
29 323 Future research using the data in this study could lead to medical and scientific products,  
30  
31 324 discoveries, as well as interventions that improve the prevention, diagnosis and treatment of  
32  
33 325 bladder cancer. A benefit for the patients is also the possibility to be part of future RCTs by providing  
34  
35 326 consent for being part of the intervention arm.  
36  
37  
38  
39  
40  
41  
42

### 43 328 **Trial Status**

44  
45 329 Protocol Version and Number: Version 2, January 2018  
46  
47 330 Date of commencement of recruitment: 23<sup>rd</sup> March 2018  
48  
49 331 Projected date of recruitment completion: 31st December 2022  
50  
51

52 332

### 53 333 **Ethics and Dissemination**

54  
55 334 The study will be conducted in compliance with the principles of the Declaration of Helsinki (1996),  
56  
57 335 the principles of GCP, and in accordance with all applicable regulatory requirements including but  
58  
59  
60

1  
2  
3 336 not limited to the Research Governance Framework and the Medicines for Human Use (Clinical Trial)  
4  
5 337 Regulations 2004, as amended in 2006 and any subsequent amendments. This protocol and related  
6  
7 338 documents were approved by the London – Fulham Research Ethics Committee (REC) as part of  
8  
9  
10 339 gaining Health Research Authority (HRA) approval (17/LO/1975).  
11

12 340

14 341 After completion of an RCT within the Roberts Study, all patients – irrespective of participation in the  
15  
16 342 specific study – will receive aggregated results via a newsletter that they can subscribe to at time of  
17  
18 343 initial consent. All results associated with this study will be published in journals as peer-reviewed  
19  
20  
21 344 articles.  
22  
23  
24  
25  
26  
27  
28  
29  
30  
31  
32  
33  
34  
35  
36  
37  
38  
39  
40  
41  
42  
43  
44  
45  
46  
47  
48  
49  
50  
51  
52  
53  
54  
55  
56  
57  
58  
59  
60

## References

1. Cancer Research UK. Bladder Cancer Facts 2017 [Available from: <http://www.cancerresearchuk.org/about-cancer/bladder-cancer/about>].
2. Crawley D, Rudman S. Epidemiology of Bladder Cancer. In: Loda M, Mucci L, Mittelstadt M, Van Hemelrijck M, Cotter M, editors. Pathology and Epidemiology of Cancer: Springer; 2016.
3. Boormans JL, Zwarthoff EC. Limited Funds for Bladder Cancer Research and What Can We Do About It. *Bladder Cancer*. 2016;2(1):49-51.
4. Young-Afat DA, van Gils CH, van den Bongard H, Verkooijen HM, Group US. The Utrecht cohort for Multiple BREast cancer intervention studies and Long-term evaLuAtion (UMBRELLA): objectives, design, and baseline results. *Breast cancer research and treatment*. 2017.
5. Relton C, Torgerson D, O'Cathain A, Nicholl J. Rethinking pragmatic randomised controlled trials: introducing the "cohort multiple randomised controlled trial" design. *BMJ*. 2010;340:c1066.
6. Relton C. Trials within Cohorts 2017 [Available from: <https://www.twics.global/use-of-the-design>].
7. Cella D. Manual of the Functional Assessment of Chronic Illness Therapy (FACIT) Scales Version 4.0. 1997.
8. Lai JS, Cella D, Chang CH, Bode RK, Heinemann AW. Item banking to improve, shorten and computerize self-reported fatigue: an illustration of steps to create a core item bank from the FACIT-Fatigue Scale. *Qual Life Res*. 2003;12(5):485-501.
9. Kroenke K, Spitzer RL, Williams JB. The PHQ-9: validity of a brief depression severity measure. *J Gen Intern Med*. 2001;16(9):606-13.
10. Herdman M, Gudex C, Lloyd A, Janssen M, Kind P, Parkin D, et al. Development and preliminary testing of the new five-level version of EQ-5D (EQ-5D-5L). *Qual Life Res*. 2011;20(10):1727-36.
11. Wendel-Vos GC, Schuit AJ, Saris WH, Kromhout D. Reproducibility and relative validity of the short questionnaire to assess health-enhancing physical activity. *J Clin Epidemiol*. 2003;56(12):1163-9.
12. Robinson SM, Jameson KA, Bloom I, Ntani G, Crozier SR, Syddall H, et al. Development of a Short Questionnaire to Assess Diet Quality among Older Community-Dwelling Adults. *J Nutr Health Aging*. 2017;21(3):247-53.
13. Walton MK, Powers JH, 3rd, Hobart J, Patrick D, Marquis P, Vamvakas S, et al. Clinical Outcome Assessments: Conceptual Foundation-Report of the ISPOR Clinical Outcomes Assessment - Emerging Good Practices for Outcomes Research Task Force. *Value in health : the journal of the International Society for Pharmacoeconomics and Outcomes Research*. 2015;18(6):741-52.

### Additional Files

Additional File 1 – Graham Roberts Study Questionnaire (doc).

The questionnaire given to patients who have consented to the Graham Roberts Study.

### List of abbreviations

|          |                                                                     |
|----------|---------------------------------------------------------------------|
| AE       | Adverse events                                                      |
| ASA      | American Society of Anesthesiologists                               |
| BMI      | Body Mass Index                                                     |
| CI       | Chief Investigator                                                  |
| CRF      | Case Research Form                                                  |
| CTCAE    | Common Terminology Criteria for Adverse Events                      |
| DMC      | Data Monitoring Committee                                           |
| EQ-5D-5L | Standardised instrument for use as a measure of health outcome      |
| FACT-BI  | Functional assessment of chronic illness therapy for bladder cancer |
| FACIT    | Functional assessment of chronic illness therapy - fatigue          |
| GCP      | Good Clinical Practice                                              |
| GSTT     | Guy's and St Thomas'                                                |
| HES      | Hospital Episode Statistics                                         |
| HRA      | Health Research Authority                                           |
| ICH      | International Conference on Harmonisation                           |
| ISPOR    | International Society for Pharmacoeconomics and Outcomes Research   |
| KCL      | King's College London                                               |
| NHS      | National Health Services                                            |
| ONS      | Office National Statistics                                          |
| PHQ-9    | Patient health questionnaire-9                                      |
| PI       | Principle Investigator                                              |
| PROMS    | Patient-reported outcomes                                           |
| QoL      | Quality of Life                                                     |
| RCT      | Randomise Clinical Trial                                            |
| REC      | Research Ethics Committee                                           |
| SOP      | Standard Operating Procedures                                       |
| SQUASH   | Questionnaire to assess health enhancing physical activity          |
| TwICs    | Trials within Cohorts                                               |
| UK       | United Kingdom                                                      |
| WHO      | World Health Organisation                                           |

**Declarations***Ethics approval and consent to participate*

The Fulham Research Ethics Committee approved the Graham Roberts Study on 22/02/2018 (Reference number: 17/LO/1975).

*Consent for publication*

Not applicable.

*Availability of data and material*

Data sharing is not applicable to this article as no datasets were generated or analysed during the current study.

*Competing interests*

The authors declare that they have no competing interests.

*Funding*

Funding to conduct the study is kindly provided by the Graham and Dianne Roberts Charitable Settlement. The funders had no role in the design of the study and collection, analysis, and interpretation of data nor in writing of the manuscript.

*Authors' contributions*

MVH, FC, HW, CR, CM, and AS designed the study with input from their clinical colleagues (SC, SH, SR, DE, DJ, RB, SA, KC, SK) and the biobank coordinator (CG). All authors read and approved the final manuscript.

*Acknowledgements*

We would like to thank our funder as well as all the patients who will contribute to the Graham Roberts Study. We would also like to extend our thanks to the patients who took part in the focus groups and informed the development of the Graham Roberts Study.



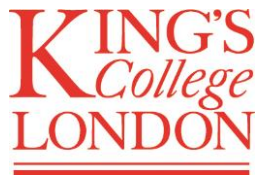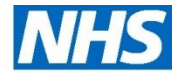

## Graham Roberts Study (Roberts Study)

### Patient Questionnaire

Through the Roberts Study, we are learning about why some bladder cancers respond better to treatment than others. This will help us to develop new and better ways of predicting recurrence and progression of bladder cancer in the future, as well as new interventions that can improve quality and quantity of life. Your participation is a critical contribution toward this goal.

This questionnaire is confidential. We will be taking every step to ensure that your answers to the interview questions are stored securely and are not shared with anyone outside the study team.

If you need any help with any of the questions, please feel free to ask the study team.

**Participant number:** \_\_\_\_\_

**Date of Birth:** \_\_\_\_\_

**Date of Questionnaire:** \_\_\_\_\_

Is this the first time you have filled in this questionnaire? Yes/No

*If this is not the first time you have filled in the questionnaire, please skip **section 1 and 2** and proceed immediately to **section 3** below.*

**Section 1 – Personal details and medical history**

**1. How would you describe your race / ethnic background?**

White/Caucasian  Black/Afro-Caribbean  Asian  Other

If other, please specify.....

**2. What is your current marital status?**

Married  Divorced/Separated  Widowed  Never married

**3. What is your current living arrangement?**

Alone  With partner  With other family

Assisted Living  Nursing Home  Other

**4. What is your current work status?**

Full-time  Part-time  Retired

Disabled  Unemployed

**5. What is your highest level of education?**

Primary school  Higher education (e.g. University)

Secondary school  Other

1  
2  
3  
4  
5  
6  
7  
8  
9  
10  
11  
12  
13  
14  
15  
16  
17  
18  
19  
20  
21  
22  
23  
24  
25  
26  
27  
28  
29  
30  
31  
32  
33  
34  
35  
36  
37  
38  
39  
40  
41  
42  
43  
44  
45  
46  
47  
48  
49  
50  
51  
52  
53  
54  
55  
56  
57  
58  
59  
60

For the following questions please circle or tick the appropriate answer:

6. Have you ever had any type of cancer (except for non-melanoma skin cancer)?

YES NO

If you answered yes, please specify: \_\_\_\_\_

7. Were any of your immediate blood relatives, that is, your mother, or father, or sister(s), or brother(s), or son(s), or daughter(s), ever diagnosed as having any type of cancer?

- Yes
- No – please continue to question 8
- I prefer not to answer
- I don't know

Who was/were diagnosed as having cancer, that is, what was his or her relationship to you?

- Mother
- Father
- Brother(s)
- Sister(s)
- Son(s)
- Daughter(s)
- I prefer not to answer
- I don't know

You indicated that at least one of your immediate blood relatives was diagnosed with cancer. Was he/she, or at least one of them (if more than one), diagnosed with **bladder cancer**?

- Yes
- No
- I prefer not to answer
- I don't know

8. Did you ever have a bladder infection with at least one of the following symptoms: frequent urination or pain or burning when urinating?

- Yes
- No
- I prefer not to answer
- I don't know

How many times did you have this kind of infection? Would you say:

- 1 or 2 times,
- 3 or 5 times,
- 6 or 10 times,
- 11 or more times?
- I prefer not to answer
- I don't know

How old were you when you first had this type of infection?

When I was \_\_\_\_\_ years old

- I prefer not to answer
- I don't know

**9. Did you ever have a kidney infection diagnosed by a physician?**

- Yes
- No
- I prefer not to answer
- I don't know

How many times did you have this kind of infection? Would you say:

- 1 or 2 times,
- 3 or 5 times,
- 6 or 10 times,
- 11 or more times?
- I prefer not to answer
- I don't know

**10. Before 1 year ago, did you ever have renal or nephritic colic, or kidney or renal stones?**

- Yes
- No
- I prefer not to answer
- I don't know

**11. Before 1 year ago, did you ever have urinary bladder stones?**

- Yes
- No
- I prefer not to answer
- I don't know

**12. Before 1 year ago, did you ever have a growth removed from your urinary bladder?**

- Yes
- No
- I prefer not to answer
- I don't know

**13. Did you ever have any of the following symptoms when urinating: difficulty starting, difficulty stopping or increased frequency during the night?**

- Yes
- No
- I prefer not to answer
- I don't know

**14. If you are a man, please answer the following question: Did your doctor ever tell you that you had an enlarged prostate?**

- Yes
- No
- I prefer not to answer
- I don't know

1  
2 **[Women only]** The next group of questions are about your reproductive history. Firstly,  
3 how old were you when you had your first menstrual period?  
4

5  years old  
6

- 7  I prefer not to answer  
8  I don't know  
9

10 Have you had at least one menstrual period in the past 12 months?  
11

- 12  Yes  
13  No  
14  I prefer not to answer  
15  I don't know  
16

17 Are you pregnant or breastfeeding?  
18

- 19  Yes  
20  No  
21  I prefer not to answer  
22  I don't know  
23

24 Have you had surgery to remove your uterus (hysterectomy)?  
25

- 26  Yes  
27  No  
28  I prefer not to answer  
29  I don't know  
30

31 Have you had any of your ovaries surgically removed (oophorectomy)?  
32

- 33  Yes  
34  No  
35  I prefer not to answer  
36  I don't know  
37

38 How many of your ovaries were removed?  
39

- 40  One  
41  Both  
42  I prefer not to answer  
43  I don't know  
44

45 Have you ever taken birth control pills?  
46

- 47  Yes  
48  No  
49  I prefer not to answer  
50  I don't know  
51

52 At what age did you first start taking birth control pills?  
53

54 \_\_\_\_\_ year old  
55  I prefer not to answer  
56  I don't know  
57

58 How long did you take birth control pills?  
59

60 \_\_\_\_\_ years \_\_\_\_\_ months  
 I prefer not to answer  
 I don't know

1 How many times have you been pregnant?

- 2  Never
- 3  \_\_\_\_\_ times
- 4  I prefer not to answer
- 5  I don't know
- 6
- 7

8 How many of your pregnancies ended in a live birth?

9

- 10 \_\_\_\_\_
- 11  I prefer not to answer
- 12  I don't know
- 13
- 14
- 15
- 16
- 17
- 18
- 19
- 20
- 21
- 22
- 23
- 24
- 25
- 26
- 27
- 28
- 29
- 30
- 31
- 32
- 33
- 34
- 35
- 36
- 37
- 38
- 39
- 40
- 41
- 42
- 43
- 44
- 45
- 46
- 47
- 48
- 49
- 50
- 51
- 52
- 53
- 54
- 55
- 56
- 57
- 58
- 59
- 60

**Section 2 – History of tobacco consumption****Please tick the most appropriate answer:**

1  
2  
3  
4  
5  
6  
7  
8  
9  
10  
11  
12  
13  
14  
15  
16  
17  
18  
19  
20  
21  
22  
23  
24  
25  
26  
27  
28  
29  
30  
31  
32  
33  
34  
35  
36  
37  
38  
39  
40  
41  
42  
43  
44  
45  
46  
47  
48  
49  
50  
51  
52  
53  
54  
55  
56  
57  
58  
59  
60

1. **During your entire lifetime, have you smoked a total of 100 cigarettes or more, which is 5 or more packs?**

- Yes
- No
- I prefer not to answer
- I don't know

2. **Did you ever smoke cigarettes regularly, that is, at least one per day for six months or longer?**

- Yes
- No
- I prefer not to answer
- I don't know

3. **Think about all the years that you smoked cigarettes, how many cigarettes per day did you usually smoke?**

- Less than one
- \_\_\_\_\_
- [please enter a number if it is more than 1, but less than 95]
- More than 95
- I prefer not to answer
- I don't know

4. **How old were you when you first started smoking at least one cigarette per day?**  
years old

- I prefer not to answer
- I don't know

5. **How old were you when you last smoked cigarettes?**

\_\_\_\_\_ years old

- I still smoke
- I refuse to answer
- I don't know

6. **When you smoked cigarettes, would you say that you usually inhaled only into your mouth, into your mouth and throat or into your chest?**

- Mouth only
- Mouth and throat
- Chest
- I do not inhale
- Cannot say, but not deeply into the chest
- I prefer not to answer
- I don't know

7. **Have you ever smoked at least one cigar per week for six months or longer?**

- Yes
- No
- I prefer not to answer
- I don't know

1  
2 **8. How old were you when you first started smoking at least one cigar per week?**

3 \_\_\_\_\_ years old

- 4  I refuse to answer  
5  I don't know  
6

7  
8 **9. How old were you when you last smoked cigars?**

9 \_\_\_\_\_ years old

- 10  I still smoke cigars  
11  I refuse to answer  
12  I don't know  
13

14 **10. For how many years altogether have you smoked/did you smoke cigars? Please do**  
15 **not include any periods during which you may have quit.**

16 \_\_\_\_\_ years \_\_\_\_\_ months

- 17  I don't know  
18  I prefer not to answer  
19

20 **11. Thinking about all the years that you smoked cigars, how many cigars did you**  
21 **usually smoke in a week?**

22  Less than one

23  \_\_\_\_\_

24 [please enter a number if it is more than 1 but less than 95]

- 25  More than 95  
26  I refuse to answer  
27  I don't know  
28  
29

30 **12. Have you ever smoked at least one pipe of tobacco per week for six months or**  
31 **longer?**

- 32  Yes  
33  No  
34  I prefer not to answer  
35  I don't know  
36  
37

38 **13. How old were you when you first started smoking at least one pipe of tobacco per**  
39 **week?**

40 \_\_\_\_\_ years old

- 41  I refuse to answer  
42  I don't know  
43

44 **14. How old were you when you last smoked a pipe?**

45 \_\_\_\_\_ years old

- 46  I still smoke a pipe  
47  I refuse to answer  
48  I don't know  
49  
50  
51  
52  
53  
54  
55  
56  
57  
58  
59  
60



### Section 3 – Current medical conditions and medications

#### 1. Have you been diagnosed with any of the following medical conditions?'

|                                          |     |    |
|------------------------------------------|-----|----|
| (a) High blood pressure                  | YES | NO |
| (b) Diabetes mellitus                    | YES | NO |
| (c) High cholesterol                     | YES | NO |
| (d) Myocardial infarction (heart attack) | YES | NO |
| (e) Angina pectoris                      | YES | NO |
| (f) Atrial fibrillation                  | YES | NO |
| (g) Congestive heart failure             | YES | NO |

#### 2. Have you regularly taken any of these medications *in the last two years?*

##### (a) Non-steroidal anti-inflammatory drugs (NSAIDs)

|                                                        |     |    |
|--------------------------------------------------------|-----|----|
| (i) Aspirin                                            | YES | NO |
| (ii) Ibuprofen (e.g. Advil, Nurofen, Nuprin, Medipren) | YES | NO |
| (iii) Other: _____                                     | YES | NO |

##### (b) "Statin" cholesterol-lowering drugs

|                                               |     |    |
|-----------------------------------------------|-----|----|
| (i) Lovastatin (e.g. Mevacor, Altacor)        | YES | NO |
| (ii) Simvastatin (e.g. Zocor)                 | YES | NO |
| (iii) Pravastatin (e.g. Pravachol, Pravigard) | YES | NO |
| (iv) Atorvastatin (e.g. Lipitor)              | YES | NO |
| (v) Other: _____                              | YES | NO |

##### (c) Beta blocker drugs

|                                         |     |    |
|-----------------------------------------|-----|----|
| (i) Metoprolol (e.g. Lopressor, Toprol) | YES | NO |
| (ii) Atenolol (e.g. Tenormin)           | YES | NO |
| (iii) Nadolol (e.g. Corgard)            | YES | NO |
| (iv) Other: _____                       | YES | NO |

**(d) Antidepressants: Selective serotonin reuptake inhibitors (SSRIs)**

|                                  |     |    |
|----------------------------------|-----|----|
| (i) Citalopram (e.g. Celexa)     | YES | NO |
| (ii) Escitalopram (e.g. Lexapro) | YES | NO |
| (iii) Fluoxetine (e.g. Prozac)   | YES | NO |
| (iv) Paroxetine (e.g. Paxil)     | YES | NO |
| (v) Sertraline (e.g. Zoloft)     | YES | NO |
| (vi) Fluvoxamine (e.g. Luvox)    | YES | NO |
| (vii) Other: _____               | YES | NO |

**(e) Other antidepressants**

|                                        |     |    |
|----------------------------------------|-----|----|
| (i) Amitriptyline (e.g. Elavil, Endep) | YES | NO |
| (ii) Imipramine (e.g. Tofranil)        | YES | NO |
| (iii) Nortriptyline (e.g. Pamelor)     | YES | NO |
| (iv) Other: _____                      | YES | NO |

**(f) Sleeping tablets**

|                                      |     |    |
|--------------------------------------|-----|----|
| (i) Diazepam (e.g. Valium)           | YES | NO |
| (ii) Alprazolam (e.g. Xanax)         | YES | NO |
| (iii) Lorazepam (e.g. Ativan)        | YES | NO |
| (iv) Chlordiazepoxide (e.g. Librium) | YES | NO |
| (v) Other: _____                     | YES | NO |

**(g) Diabetes medications**

|                                    |     |    |
|------------------------------------|-----|----|
| (i) Insulin                        | YES | NO |
| (ii) Metformin                     | YES | NO |
| (iii) Rosiglitazone (e.g. Avandia) | YES | NO |
| (iv) Pioglitazone (e.g. Actos)     | YES | NO |
| (v) Other: _____                   | YES | NO |

**(h) Are you on any other long-term medication?** \_\_\_\_\_

**Section 4 – Current smoking behaviour, alcohol consumption and other environmental/occupational exposures**

**Please circle the most appropriate answer:**

1. **Do you currently smoke cigarettes, a pipe or cigars? If you answered YES, how many cigarettes, pipe refills or cigars do you smoke per day?**

| Currently smoke?          | Cigarettes |    | Pipe       |    | Cigars     |    |
|---------------------------|------------|----|------------|----|------------|----|
|                           | YES        | NO | YES        | NO | YES        | NO |
| If yes, how many per day? | 1-4        |    | 1-4        |    | 1-4        |    |
|                           | 5-14       |    | 5-10       |    | 5-10       |    |
|                           | 15-24      |    | 10 or more |    | 10 or more |    |
|                           | 25-34      |    |            |    |            |    |
|                           | 35-44      |    |            |    |            |    |
|                           | 45 or more |    |            |    |            |    |

2. **In a typical week over the past three months, on how many days did you consume an alcoholic drink of any type?**

*No days*                      *1 day per week*                      *2 days per week*                      *3 days per week*  
*4 days per week*                      *5 days per week*                      *6 days per week*                      *7 days per week*

3. **In a typical month, what is the largest number of drinks of beer, wine and / or spirits you have in one day?**

*None*                      *1-2 drinks per day*                      *3-5 drinks per day*  
*6-9 drinks per day*                      *10-14 drinks per day*                      *15 or more drinks per day*

4. **On a typical day, what is the total number of alcoholic and non-alcoholic drinks combined you have in one day?**

*1-2 pints per day*                      *3-5 pints per day*  
*6-9 pints per day*                      *10-14 pints per day*                      *15 or more pints per day*

5. **On a typical day, how many cups of coffee do you drink in one day?**

*None*                      *1-2 cups per day*                      *3-5 cups per day*  
*6-9 cups per day*                      *10 or more cups per day*

6. **Have you ever worked in the production of rubber or aluminium or were you exposed to aromatic amines (eg. printing or dye industry) for five years or more?**

YES                      NO

7. **Do you get your drinking water from a private well?**                      YES                      NO

**Section 5 – Quality of Life (FACT-BI)**

Below is a list of statements that other people have said are important. **Please circle or mark one number per line to indicate your response as it applies to the past 7 days.**

**PHYSICAL WELL-BEING**

|     |                                                                                       | Not at all | A little bit | Some-what | Quite a bit | Very much |
|-----|---------------------------------------------------------------------------------------|------------|--------------|-----------|-------------|-----------|
| GP1 | I have a lack of energy.....                                                          | 0          | 1            | 2         | 3           | 4         |
| GP2 | I have nausea.....                                                                    | 0          | 1            | 2         | 3           | 4         |
| GP3 | Because of my physical condition, I have trouble meeting the needs of my family ..... | 0          | 1            | 2         | 3           | 4         |
| GP4 | I have pain.....                                                                      | 0          | 1            | 2         | 3           | 4         |
| GP5 | I am bothered by side effects of treatment.....                                       | 0          | 1            | 2         | 3           | 4         |
| GP6 | I feel ill.....                                                                       | 0          | 1            | 2         | 3           | 4         |
| GP7 | I am forced to spend time in bed.....                                                 | 0          | 1            | 2         | 3           | 4         |

**SOCIAL/FAMILY WELL-BEING**

|     |                                                                                                                                                                                                             | Not at all | A little bit | Some-what | Quite a bit | Very much |
|-----|-------------------------------------------------------------------------------------------------------------------------------------------------------------------------------------------------------------|------------|--------------|-----------|-------------|-----------|
| GS1 | I feel close to my friends.....                                                                                                                                                                             | 0          | 1            | 2         | 3           | 4         |
| GS2 | I get emotional support from my family .....                                                                                                                                                                | 0          | 1            | 2         | 3           | 4         |
| GS3 | I get support from my friends .....                                                                                                                                                                         | 0          | 1            | 2         | 3           | 4         |
| GS4 | My family has accepted my illness.....                                                                                                                                                                      | 0          | 1            | 2         | 3           | 4         |
| GS5 | I am satisfied with family communication about my illness .....                                                                                                                                             | 0          | 1            | 2         | 3           | 4         |
| GS6 | I feel close to my partner (or the person who is my main support) .....                                                                                                                                     | 0          | 1            | 2         | 3           | 4         |
| Q1  | <i>Regardless of your current level of sexual activity, please answer the following question. If you prefer not to answer it, please mark this box <input type="checkbox"/> and go to the next section.</i> |            |              |           |             |           |
| GS7 | I am satisfied with my sex life .....                                                                                                                                                                       | 0          | 1            | 2         | 3           | 4         |

**EMOTIONAL WELL-BEING**

|     |                                                           | Not at all | A little bit | Some-what | Quite a bit | Very much |
|-----|-----------------------------------------------------------|------------|--------------|-----------|-------------|-----------|
| GE1 | I feel sad .....                                          | 0          | 1            | 2         | 3           | 4         |
| GE2 | I am satisfied with how I am coping with my illness ..... | 0          | 1            | 2         | 3           | 4         |
| GE3 | I am losing hope in the fight against my illness.....     | 0          | 1            | 2         | 3           | 4         |
| GE4 | I feel nervous.....                                       | 0          | 1            | 2         | 3           | 4         |
| GE5 | I worry about dying.....                                  | 0          | 1            | 2         | 3           | 4         |
| GE6 | I worry that my condition will get worse .....            | 0          | 1            | 2         | 3           | 4         |

**FUNCTIONAL WELL-BEING**

|     |                                                         | Not at all | A little bit | Some-what | Quite a bit | Very much |
|-----|---------------------------------------------------------|------------|--------------|-----------|-------------|-----------|
| GF1 | I am able to work (include work at home) .....          | 0          | 1            | 2         | 3           | 4         |
| GF2 | My work (include work at home) is fulfilling.....       | 0          | 1            | 2         | 3           | 4         |
| GF3 | I am able to enjoy life .....                           | 0          | 1            | 2         | 3           | 4         |
| GF4 | I have accepted my illness .....                        | 0          | 1            | 2         | 3           | 4         |
| GF5 | I am sleeping well.....                                 | 0          | 1            | 2         | 3           | 4         |
| GF6 | I am enjoying the things I usually do for fun.....      | 0          | 1            | 2         | 3           | 4         |
| GF7 | I am content with the quality of my life right now..... | 0          | 1            | 2         | 3           | 4         |

Please circle or mark one number per line to indicate your response as it applies to the past 7 days.

| <b><u>ADDITIONAL CONCERNS</u></b> |                                                                                                  | <b>Not<br/>at all</b> | <b>A little<br/>bit</b> | <b>Some-<br/>what</b> | <b>Quite<br/>a bit</b> | <b>Very<br/>much</b> |
|-----------------------------------|--------------------------------------------------------------------------------------------------|-----------------------|-------------------------|-----------------------|------------------------|----------------------|
| BL1                               | I have trouble controlling my urine.....                                                         | 0                     | 1                       | 2                     | 3                      | 4                    |
| C2                                | I am losing weight .....                                                                         | 0                     | 1                       | 2                     | 3                      | 4                    |
| C3                                | I have control of my bowels.....                                                                 | 0                     | 1                       | 2                     | 3                      | 4                    |
| BL2                               | I urinate more frequently than usual .....                                                       | 0                     | 1                       | 2                     | 3                      | 4                    |
| C5                                | I have diarrhoea .....                                                                           | 0                     | 1                       | 2                     | 3                      | 4                    |
| C6                                | I have a good appetite.....                                                                      | 0                     | 1                       | 2                     | 3                      | 4                    |
| C7                                | I like the appearance of my body.....                                                            | 0                     | 1                       | 2                     | 3                      | 4                    |
| BL3                               | It burns when I urinate.....                                                                     | 0                     | 1                       | 2                     | 3                      | 4                    |
| BL4                               | I am interested in sex.....                                                                      | 0                     | 1                       | 2                     | 3                      | 4                    |
| BL5                               | (For men only) I am able to have and maintain an<br>erection .....                               | 0                     | 1                       | 2                     | 3                      | 4                    |
| Q2                                | Do you have an ostomy appliance?<br>No___ Yes___ If yes, answer the following two<br>items:<br>↓ |                       |                         |                       |                        |                      |
| C8                                | I am embarrassed by my ostomy appliance .....                                                    | 0                     | 1                       | 2                     | 3                      | 4                    |
| C9                                | Caring for my ostomy appliance is difficult.....                                                 | 0                     | 1                       | 2                     | 3                      | 4                    |

**Section 6 – Fatigue (FACIT - Fatigue)**

Below is a list of statements that other people have said are important. **Please circle or mark one number per line to indicate your response as it applies to the past 7 days.**

|      |                                                                       | Not at all | A little bit | Some-what | Quite a bit | Very much |
|------|-----------------------------------------------------------------------|------------|--------------|-----------|-------------|-----------|
| HI7  | I feel fatigued.....                                                  | 0          | 1            | 2         | 3           | 4         |
| HI12 | I feel weak all over.....                                             | 0          | 1            | 2         | 3           | 4         |
| An1  | I feel listless (“washed out”).....                                   | 0          | 1            | 2         | 3           | 4         |
| An2  | I feel tired .....                                                    | 0          | 1            | 2         | 3           | 4         |
| An3  | I have trouble <u>starting</u> things because I am tired.....         | 0          | 1            | 2         | 3           | 4         |
| An4  | I have trouble <u>finishing</u> things because I am tired .....       | 0          | 1            | 2         | 3           | 4         |
| An5  | I have energy.....                                                    | 0          | 1            | 2         | 3           | 4         |
| An7  | I am able to do my usual activities .....                             | 0          | 1            | 2         | 3           | 4         |
| An8  | I need to sleep during the day .....                                  | 0          | 1            | 2         | 3           | 4         |
| An12 | I am too tired to eat.....                                            | 0          | 1            | 2         | 3           | 4         |
| An14 | I need help doing my usual activities .....                           | 0          | 1            | 2         | 3           | 4         |
| An15 | I am frustrated by being too tired to do the things I want to do..... | 0          | 1            | 2         | 3           | 4         |
| An16 | I have to limit my social activity because I am tired.....            | 0          | 1            | 2         | 3           | 4         |

Peer review only

Over the past 2 weeks, how often have you been bothered by any of the following problems?

|                                                                                                                                                                              | Not At all | Several Days | More Than Half the Days | Nearly Every Day |
|------------------------------------------------------------------------------------------------------------------------------------------------------------------------------|------------|--------------|-------------------------|------------------|
| 1. Little interest or pleasure in doing things                                                                                                                               | 0          | 1            | 2                       | 3                |
| 2. Feeling down, depressed or hopeless                                                                                                                                       | 0          | 1            | 2                       | 3                |
| 3. Trouble falling asleep, staying asleep, or sleeping too much                                                                                                              | 0          | 1            | 2                       | 3                |
| 4. Feeling tired or having little energy                                                                                                                                     | 0          | 1            | 2                       | 3                |
| 5. Poor appetite or overeating                                                                                                                                               | 0          | 1            | 2                       | 3                |
| 6. Feeling bad about yourself - or that you're a failure or have let yourself or your family down                                                                            | 0          | 1            | 2                       | 3                |
| 7. Trouble concentrating on things, such as reading the newspaper or watching television                                                                                     | 0          | 1            | 2                       | 3                |
| 8. Moving or speaking so slowly that other people could have noticed. Or, the opposite - being so fidgety or restless that you have been moving around a lot more than usual | 0          | 1            | 2                       | 3                |
| 9. Thoughts that you would be better off dead or of hurting yourself in some way                                                                                             | 0          | 1            | 2                       | 3                |

Column Totals \_\_\_\_\_ + \_\_\_\_\_ + \_\_\_\_\_

Add Totals Together \_\_\_\_\_

10. If you checked off any problems, how difficult have those problems made it for you to Do your work, take care of things at home, or get along with other people?

Not difficult at all    Somewhat difficult    Very difficult    Extremely difficult

**Section 8 – Health Questionnaire (EQ-5D-5L)**

Under each heading, please tick the ONE box that best describes your health TODAY.

**MOBILITY**

- 1 I have no problems in walking about
- 2
- 3 I have slight problems in walking about
- 4
- 5 I have moderate problems in walking about
- 6
- 7 I have severe problems in walking about
- 8
- 9 I am unable to walk about

**SELF-CARE**

- 10 I have no problems washing or dressing myself
- 11
- 12 I have slight problems washing or dressing myself
- 13
- 14 I have moderate problems washing or dressing myself
- 15
- 16 I have severe problems washing or dressing myself
- 17
- 18 I am unable to wash or dress myself

**USUAL ACTIVITIES** (e.g. work, study, housework, family or leisure activities)

- 19 I have no problems doing my usual activities
- 20
- 21 I have slight problems doing my usual activities
- 22
- 23 I have moderate problems doing my usual activities
- 24
- 25 I have severe problems doing my usual activities
- 26
- 27 I am unable to do my usual activities

**PAIN / DISCOMFORT**

- 28 I have no pain or discomfort
- 29
- 30 I have slight pain or discomfort
- 31
- 32 I have moderate pain or discomfort
- 33
- 34 I have severe pain or discomfort
- 35
- 36 I have extreme pain or discomfort

**ANXIETY / DEPRESSION**

- 37 I am not anxious or depressed
- 38
- 39 I am slightly anxious or depressed
- 40
- 41 I am moderately anxious or depressed
- 42
- 43 I am severely anxious or depressed
- 44
- 45 I am extremely anxious or depressed



The best health  
you can imagine



- We would like to know how good or bad your health is TODAY.
- This scale is numbered from 0 to 100.
- 100 means the best health you can imagine.  
0 means the worst health you can imagine.
- Mark an X on the scale to indicate how your health is TODAY.
- Now, please write the number you marked on the scale in the box below.

YOUR HEALTH TODAY =

The worst health  
you can imagine

**Section 9 – Physical activity**

Think about an average week in the past months. Please indicate **how many days per week** you performed the following activities, how much time on average you were engaged in this, and (if applicable) how strenuous this activity was for you?

|                                                                | <b>Days per week</b> | <b>Average time per day</b> | <b>Effort (circle please)</b> |
|----------------------------------------------------------------|----------------------|-----------------------------|-------------------------------|
| <b>Walking</b>                                                 | days                 | hours minutes               | slow/moderate/fast            |
| <b>Bicycling</b>                                               | days                 | hours minutes               | slow/moderate/fast            |
| <b>Other physical activity (e.g. swimming, gym, gardening)</b> | days                 | hours minutes               | slow/moderate/fast            |

**If you wear a pedometer on a regular basis, on average how many steps a day do you take?**

*<2500 steps*

*2500-4999 steps*

*5000-9999 steps*

*10000 or more steps*

*N/A – do not use*

**Section 10 – Diet (Hertfordshire Short Questionnaire)**

The section below asks you about how often over the past 3 months you have eaten particular foods.

| FOOD AND AMOUNTS                                                                  |                                                                   | AVERAGE USE IN PAST 3 MONTHS |                      |               |             |             |          |            |             |            |            |
|-----------------------------------------------------------------------------------|-------------------------------------------------------------------|------------------------------|----------------------|---------------|-------------|-------------|----------|------------|-------------|------------|------------|
|                                                                                   |                                                                   | Never                        | Less than once/month | 1-3 per month | Once a week | 2-4 pe week | 5-6 week | Once a day | 2-3 per day | 4-5 pe day | 6+ per day |
| 1                                                                                 | White bread (one slice)                                           |                              |                      |               |             |             |          |            |             |            |            |
| 2                                                                                 | Brown and wholemeal bread (one slice)                             |                              |                      |               |             |             |          |            |             |            |            |
| 3                                                                                 | Biscuits eg digestive (one)                                       |                              |                      |               |             |             |          |            |             |            |            |
| 4                                                                                 | Apples (one fruit)                                                |                              |                      |               |             |             |          |            |             |            |            |
| 5                                                                                 | Bananas (one fruit)                                               |                              |                      |               |             |             |          |            |             |            |            |
| 6                                                                                 | Melon, pineapple, kiwi and other tropical fruits (medium serving) |                              |                      |               |             |             |          |            |             |            |            |
| 7                                                                                 | Green salad eg lettuce, cucumber, celery                          |                              |                      |               |             |             |          |            |             |            |            |
| 8                                                                                 | Garlic – raw and cooked dishes                                    |                              |                      |               |             |             |          |            |             |            |            |
| 9                                                                                 | Marrow and courgettes                                             |                              |                      |               |             |             |          |            |             |            |            |
| 10                                                                                | Pepper – cooked and fresh                                         |                              |                      |               |             |             |          |            |             |            |            |
| 11                                                                                | Yogurt (125g pot)                                                 |                              |                      |               |             |             |          |            |             |            |            |
| 12                                                                                | Egg as boiled, fried, scrambled, etc (one egg)                    |                              |                      |               |             |             |          |            |             |            |            |
| 13                                                                                | White fish eg cod, haddock, plaice, sole (not in batter/crumbs)   |                              |                      |               |             |             |          |            |             |            |            |
| 14                                                                                | Oily fish, eg mackerel, tuna, salmon                              |                              |                      |               |             |             |          |            |             |            |            |
| 15                                                                                | Bacon and gammon                                                  |                              |                      |               |             |             |          |            |             |            |            |
| 16                                                                                | Meat pies, eg pork pie, pasties, steak & kidney, sausage rolls    |                              |                      |               |             |             |          |            |             |            |            |
| 17                                                                                | Boiled, mashed and jacket potatoes (one egg size potato)          |                              |                      |               |             |             |          |            |             |            |            |
| 18                                                                                | Chips                                                             |                              |                      |               |             |             |          |            |             |            |            |
| 19                                                                                | Pasta eg spaghetti, macaroni                                      |                              |                      |               |             |             |          |            |             |            |            |
| Which is the main spreading fat you have used for example on bread or vegetables? |                                                                   |                              |                      |               |             |             |          |            |             |            |            |
| 20                                                                                | Spreading fat (teaspoon)                                          |                              |                      |               |             |             |          |            |             |            |            |
|                                                                                   | _____                                                             |                              |                      |               |             |             |          |            |             |            |            |

**ADDITIONAL DIETARY QUESTIONS**

**Q21** Which types of milk have you used regularly in drinks and added to breakfast cereals over the past three months? Circle all that apply.

1. Whole pasteurised
2. Semi-skimmed pasteurised (include 1% milks)
3. Skimmed pasteurised
4. Whole UHT
5. Semi-skimmed UHT
6. Skimmed UHT
7. Other: \_\_\_\_\_ (please specify)
8. None (go to Q23)

Of the above, which are the three types of milk that you drink most commonly?

Number \_\_\_\_ (Milk A)

Number \_\_\_\_ (Milk B)

Number \_\_\_\_ (Milk C)

**Q22** On average over the past three months how much of the above have you consumed per day?

Milk A                    \_\_\_\_ . \_\_\_\_\_ pints

Milk B                    \_\_\_\_ . \_\_\_\_\_ pints

Milk C                    \_\_\_\_ . \_\_\_\_\_ pints

**Q23** Have you added sugar to tea and coffee or breakfast cereals in the past three months?

No

Yes (go to Q24)

**Q24** Approximately how many teaspoons of sugar have you added each day? \_\_\_\_\_
